# Supplementary material for: Disability Among Young Adults With Congenital Heart Defects: Congenital Heart Survey to Recognize Outcomes, Needs, and Well‐Being 2016–2019
Source: PubMed Central journal article supplement — J Am Heart Assoc. 2021 Oct 20;10(21):e022440. doi: 10.1161/JAHA.121.022440 (PMC8751822; doi:10.1161/jaha.121.022440), 2021-10-20

# **SUPPLEMENTAL MATERIAL**

**SUPPLEMENTAL MATERIAL**

Table S1: CHD inclusions and exclusions

| Severe Codes                   |                                                                           |
|--------------------------------|---------------------------------------------------------------------------|
| 745.000                        | Common Truncus                                                            |
| 745.010                        | Aortic septal defect (ASD) / Aortopulmonary window                        |
| 745.100—745.190                | Transposition (all types)                                                 |
| 745.100                        | Transposition of great vessels, complete (no VSD)                         |
| 745.110                        | Transposition of great vessels, incomplete (w/ VSD), Taussig Bing         |
| 745.120                        | Corrected transposition of great vessels, L transposition, vent inversion |
| 745.190                        | Unspecified transposition of great vessels                                |
| 745.200                        | Tetralogy of Fallot                                                       |
| 745.210                        | Fallot's pentalogy (tetralogy plus ASD)                                   |
| 745.300                        | Single ventricle, common ventricle, cor triloculare biatriatum            |
| 745.620                        | Common atrioventricular canal with ventricular septal defect (VSD)        |
| 745.630                        | Common atrioventricular canal                                             |
| 745.680                        | Other specified cushion defect                                            |
| 745.690                        | Endocardial cushion defect, NOS                                           |
| 746.000                        | Pulmonary valve atresia, hypoplasia                                       |
| 746.100                        | Tricuspid atresia and stenosis                                            |
| 746.505                        | Absence, atresia, or hypoplasia of mitral valve                           |
| 746.700                        | Hypoplastic Left Heart Syndrome (HLHS)                                    |
| 747.100—747.190                | Coarctation of the aorta (all types)                                      |
| 747.100                        | Pre-ductal                                                                |
| 747.110                        | Post-ductal                                                               |
| 747.120                        | Ductal                                                                    |
| 747.200                        | Aortic atresia (including pseudotruncus arteriosus)                       |
| 747.210                        | Aortic hypoplasia                                                         |
| 747.215—747.217,<br>or 747.285 | Interrupted aortic arch                                                   |
| 747.420                        | Total Anomalous Pulmonary Venus Return (TAPVR)                            |

**SUPPLEMENTAL MATERIAL**

Table S1: CHD inclusions and exclusions

| <b>Non-severe: Shunt + Valve Codes</b>                                                        |                                                                            |
|-----------------------------------------------------------------------------------------------|----------------------------------------------------------------------------|
| 745.520                                                                                       | Lutembacher syndrome                                                       |
| 746.840                                                                                       | Trilogy of Fallot                                                          |
| <i>Other cases will be in this category if have codes in both Shunt and Valve categories.</i> |                                                                            |
| <b>Non-severe: Shunt Codes</b>                                                                |                                                                            |
| 745.400—745.490                                                                               | Ventricular Septal Defect (VSD), (all types)                               |
| 745.400                                                                                       | Roger's disease                                                            |
| 745.410                                                                                       | Eisenmenger's syndrome                                                     |
| 745.420                                                                                       | Gerbode defect                                                             |
| 745.480                                                                                       | Other specified ventricular septal defect                                  |
| 745.490                                                                                       | Ventricular septal defect, NOS                                             |
| 745.510                                                                                       | Secundum atrial septal defect                                              |
| 745.580                                                                                       | Other specified atrial septal defect                                       |
| 745.590                                                                                       | Atrial septal defect, NOS                                                  |
| 745.600                                                                                       | Ostium primum defects                                                      |
| 745.610                                                                                       | Single common atrium, cor triloculare biventriculare                       |
| 745.800                                                                                       | Other bulbus cordis anomalies and anomalies of cardiac septal closure      |
| 745.900                                                                                       | Unspecified defect of septal closure                                       |
| 747.430                                                                                       | Partial anomalous pulmonary venous return (PAPVR)                          |
| <b>Non-severe: Valve Codes</b>                                                                |                                                                            |
| 746.010                                                                                       | Pulmonary valve stenosis                                                   |
| 746.830                                                                                       | Pulmonary infundibular stenosis                                            |
| 746.080                                                                                       | Other specified anomalies of the pulmonary valve                           |
| 746.090                                                                                       | Unspecified anomaly of pulmonary valve                                     |
| 746.200                                                                                       | Ebstein anomaly                                                            |
| 746.300                                                                                       | Aortic valve stenosis (includes valvar and subvalvar)                      |
| 747.220                                                                                       | Supra-aortic stenosis (supra-valvar)                                       |
| 746.480                                                                                       | Other specified anomalies of aortic valve (including aortic valve atresia) |
| 746.790                                                                                       | Unspecified anomalies of aortic valve                                      |
| 746.500                                                                                       | Congenital mitral stenosis                                                 |

**SUPPLEMENTAL MATERIAL**

Table S1: CHD inclusions and exclusions

|                                |                                                             |
|--------------------------------|-------------------------------------------------------------|
| 746.900                        | Unspecified anomalies of heart valves                       |
| 746.995                        | Pulmonic or pulmonary atresia, stenosis, or hypoplasia, NOS |
| 747.300                        | Pulmonary artery atresia, absence, or agenesis              |
| 747.310                        | Pulmonary artery atresia with septal defect                 |
| <b>Non-severe: Other Codes</b> |                                                             |
| 745.700                        | Cor biloculare                                              |
| 746.820                        | Cor triatriatum                                             |
| 746.881                        | Hypoplastic left ventricle                                  |
| 746.882                        | Hypoplastic right heart/ ventricle (Uhl's disease)          |
| 746.883                        | Hypoplastic ventricle, NOS                                  |
| 746.885                        | Coronary artery anomaly                                     |
| 746.887                        | Other defects of the atria                                  |
| 746.910                        | Anomalous bands of heart                                    |
| 746.920                        | Acyanotic congenital heart disease, NOS                     |
| 746.930                        | Cyanotic congenital heart disease, NOS                      |
| 747.230—747.290                | Anomalies of aorta (all types)                              |
| 747.230                        | Persistent right aortic arch                                |
| 747.240                        | Aneurysm of sinus of Valsalva                               |
| 747.250                        | Vascular ring (includes double aortic arch)                 |
| 747.260                        | Overriding aorta                                            |
| 747.270                        | Aortic aneurysm                                             |
| 747.280                        | Other specified anomalies of aorta                          |
| 747.290                        | Unspecified anomalies of aorta                              |
| 747.400                        | Stenosis of vena cava (inferior or superior)                |
| 747.410                        | Persistent left superior vena cava                          |

NOS: Not otherwise specified

CHD case is excluded if ONLY has **one or more** of these codes:

745.xx8, 746.xx8, 747.xx8      ANY CHD code which is considered “possible or probable,” designated by using an “8” as the 6<sup>th</sup> digit.

745.500    Patent Foramen Ovale

## SUPPLEMENTAL MATERIAL

Table S1: CHD inclusions and exclusions

|                   |                                                                                                                                                           |
|-------------------|-----------------------------------------------------------------------------------------------------------------------------------------------------------|
| 746.020           | Pulmonary insufficiency                                                                                                                                   |
| 746.105           | Tricuspid valve insufficiency                                                                                                                             |
| 746.400           | Aortic insufficiency/Bicuspid aortic valve                                                                                                                |
| 746.600           | Mitral insufficiency                                                                                                                                      |
| 746.800           | Dextrocardia                                                                                                                                              |
| 746.810           | Levocardia                                                                                                                                                |
| 746.850           | Anomalies of pericardium                                                                                                                                  |
| 746.860           | Anomalies of myocardium                                                                                                                                   |
| 746.870           | Congenital heart block                                                                                                                                    |
| 746.880           | Other specified anomaly of heart                                                                                                                          |
| 746.886           | Ventricular hypertrophy                                                                                                                                   |
| 746.990           | Unspecified anomalies of heart                                                                                                                            |
| 747.000           | Patent Ductus Arteriosus                                                                                                                                  |
| 747.320 – 747.399 | This includes ALL of the following codes, and any designation of left or right-sidedness (a “1” or “2” is used as 6 <sup>th</sup> digit for this purpose) |
| 747.320           | Pulmonary artery stenosis                                                                                                                                 |
| 747.325           | Peripheral pulmonary artery stenosis                                                                                                                      |
| 747.330           | Aneurysm of pulmonary artery                                                                                                                              |
| 747.340           | Pulmonary AVM                                                                                                                                             |
| 747.380           | Other specified anomaly of pulmonary artery                                                                                                               |
| 747.390           | Unspecified anomaly of pulmonary artery                                                                                                                   |
| 747.440           | Anomalous portal vein termination                                                                                                                         |
| 747.450           | Portal-hepatic vein fistula                                                                                                                               |
| 747.480           | Other specified anomalies of great veins                                                                                                                  |
| 747.490           | Unspecified anomalies of great veins                                                                                                                      |
| 747.500           | Single umbilical artery                                                                                                                                   |
| 747.6xx           | Other anomalies of peripheral vascular system, including:                                                                                                 |
| 747.600           | Stenosis of renal artery                                                                                                                                  |
| 747.610           | Other anomalies of renal artery                                                                                                                           |
| 747.620           | Arteriovenous malformation (peripheral)                                                                                                                   |
| 747.630           | Congenital phlebectasia, congenital varix                                                                                                                 |
| 747.640           | Other anomalies of peripheral arteries, including aberrant subclavian artery                                                                              |
| 747.650           | Other anomalies of peripheral veins                                                                                                                       |
| 747.680           | Other anomalies of peripheral vascular system                                                                                                             |
| 747.690           | Unspecified anomalies of peripheral vascular system                                                                                                       |
| 747.8xx           | Other specified anomalies of circulatory system, including:                                                                                               |
| 747.800           | Arteriovenous (malformation) aneurysm of brain                                                                                                            |
| 747.810           | Other anomalies of cerebral vessels                                                                                                                       |
| 747.880           | OS anomalies of circulatory system                                                                                                                        |
| 747.9xx           | Unspecified anomaly of circulatory system                                                                                                                 |

**SUPPLEMENTAL MATERIAL**

Table S2: CDC/BPA Codes to Identify Non-Cardiac Congenital Anomalies

|        |                                                               |        |                                                  |
|--------|---------------------------------------------------------------|--------|--------------------------------------------------|
| 90000  | Syphilis, congenital                                          | 228000 | Hemangioma - Unspecified site                    |
| 155000 | Neoplasms - Liver                                             | 228010 | Hemangioma - Skin and subcutaneous, NOS          |
| 159800 | Neoplasms - Abdomen                                           | 228020 | Hemangioma - Intracranial                        |
| 162800 | Neoplasms - Lung, laterality unk                              | 228030 | Hemangioma - Retinal, laterality unk             |
| 162801 | Neoplasms - Lung, left                                        | 228031 | Hemangioma - Retinal, left                       |
| 162802 | Neoplasms - Lung, right                                       | 228032 | Hemangioma - Retinal, right                      |
| 162803 | Neoplasms - Lung, unilateral NOS                              | 228033 | Hemangioma - Retinal, unilateral NOS             |
| 162804 | Neoplasms - Lung, bilateral                                   | 228034 | Hemangioma - Retinal, bilateral                  |
| 171800 | Neoplasms - Connective tissue                                 | 228040 | Hemangioma - intra-abdominal                     |
| 186000 | Neoplasms - Testes, laterality unk                            | 228090 | Hemangioma - Other sites                         |
| 186001 | Neoplasms - Testes, left                                      | 228100 | Cystic hygroma, laterality unk                   |
| 186002 | Neoplasms - Testes, right                                     | 228101 | Cystic hygroma, left                             |
| 186003 | Neoplasms - Testes, unilateral NOS                            | 228102 | Cystic hygroma, right                            |
| 186004 | Neoplasms - Testes, bilateral                                 | 228103 | Cystic hygroma, unilateral NOS                   |
| 189000 | Wilms tumor - laterality unk                                  | 228104 | Cystic hygroma, bilateral                        |
| 189001 | Wilms tumor - left                                            | 237700 | Neurofibromatosis                                |
| 189002 | Wilms tumor - right                                           | 238000 | Teratoma - NOS                                   |
| 189003 | Wilms tumor - unilateral NOS                                  | 238010 | Teratoma - Head and face                         |
| 189004 | Wilms tumor - bilateral                                       | 238020 | Teratoma - Neck                                  |
| 190500 | Retinoblastoma - laterality unk                               | 238030 | Teratoma - Abdomen                               |
| 190501 | Retinoblastoma - left eye                                     | 238040 | Teratoma - Sacral or coccygeal                   |
| 190502 | Retinoblastoma - right eye                                    | 238080 | Teratoma - Other specified                       |
| 190503 | Retinoblastoma - unilateral NOS                               | 239200 | Neck cyst, laterality unk                        |
| 190504 | Retinoblastoma - both eyes                                    | 239201 | Neck cyst, left                                  |
| 191000 | Neoplasms - CNS                                               | 239202 | Neck cyst, right                                 |
| 194000 | Neuroblastoma                                                 | 239203 | Neck cyst, unilateral NOS                        |
| 202300 | Histiocytosis, malignant                                      | 239204 | Neck cyst, bilateral                             |
| 208000 | Leukemia - Congenital, NOS                                    | 253280 | Hypopituitarism, congenital                      |
| 214000 | Lipoma - Skin and subcutaneous tissue of face, laterality unk | 253820 | Diencephalic syndrome                            |
| 214001 | Lipoma - Skin and subcutaneous tissue of left face            | 255200 | Adrenogenital syndrome                           |
| 214002 | Lipoma - Skin and subcutaneous tissue of right face           | 257800 | Testicular feminization syndrome                 |
| 214003 | Lipoma - Skin and subcutaneous tissue of face, unilateral NOS | 272700 | Lysosomal storage diseases                       |
| 214004 | Lipoma - Skin and subcutaneous tissue of both sides of face   | 277400 | Disorders of bilirubin excretion                 |
| 214100 | Lipoma - Other skin and subcutaneous tissue                   | 277500 | Mucopolysaccharidoses                            |
| 214200 | Lipoma - Intrathoracic organs                                 | 277510 | Hurler syndrome                                  |
| 214300 | Lipoma - Intra-abdominal organs                               | 279110 | DiGeorge syndrome                                |
| 214400 | Lipoma - Spermatic cord, laterality unk                       | 279200 | Combined immunodeficiency syndrome               |
| 214401 | Lipoma - Spermatic cord, left                                 | 331890 | Familial degenerative CNS disease                |
| 214402 | Lipoma - Spermatic cord, right                                | 335000 | Werdnig-Hoffman disease                          |
| 214403 | Lipoma - Spermatic cord, unilateral NOS                       | 345600 | Infantile spasms, congenital                     |
| 214404 | Lipoma - Spermatic cord, bilateral                            | 352600 | Moebius syndrome                                 |
| 214800 | Lipoma - Other specified sites                                | 362600 | Retinal degeneration, peripheral, laterality unk |
| 214810 | Lipoma - Lumbar or sacral lipoma                              | 362601 | Retinal degeneration, peripheral, left eye       |
| 214900 | Lipoma - Unspecified                                          | 362602 | Retinal degeneration, peripheral, right eye      |
| 216920 | Hairy nevus                                                   | 362603 | Retinal degeneration, peripheral, unilateral NOS |
|        |                                                               | 362604 | Retinal degeneration, peripheral, both eyes      |
|        |                                                               | 362700 | Retinitis pigmentosa                             |
|        |                                                               | 363200 | Chorioretinitis, laterality unk                  |
|        |                                                               | 363201 | Chorioretinitis, left eye                        |
|        |                                                               | 363202 | Chorioretinitis, right eye                       |
|        |                                                               | 363203 | Chorioretinitis, unilateral NOS                  |

**SUPPLEMENTAL MATERIAL**

Table S2: CDC/BPA Codes to Identify Non-Cardiac Congenital Anomalies

|        |                                                       |        |                                                        |
|--------|-------------------------------------------------------|--------|--------------------------------------------------------|
| 741990 | Spina bifida without hydrocephalus - Unspecified site | 742580 | Other specified anomalies of spinal cord and membranes |
| 742000 | Encephalocele - Occipital                             | 742800 | Jaw-winking syndrome                                   |
| 742080 | Encephalocele - Other specified site                  | 742810 | Familial dysautonomia                                  |
| 742085 | Encephalocele - Frontal                               | 742880 | Other specified anomalies of nervous system            |
| 742086 | Encephalocele - Parietal                              | 742900 | Unspecified anomalies - Brain                          |
| 742090 | Encephalocele - Unspecified site                      | 742910 | Unspecified anomalies - Spinal cord                    |
| 742100 | Microcephalus                                         | 742990 | Unspecified anomalies - Nervous system                 |
| 742200 | Anomalies of cerebrum                                 | 743000 | Anophthalmos, laterality unk                           |
| 742210 | Anomalies of corpus callosum                          | 743001 | Anophthalmos, left eye                                 |
| 742220 | Anomalies of hypothalamus                             | 743002 | Anophthalmos, right eye                                |
| 742230 | Anomalies of cerebellum                               | 743003 | Anophthalmos, unilateral NOS                           |
| 742235 | Cerebellar Hypoplasia                                 | 743004 | Anophthalmos, both eyes                                |
| 742240 | Agyria and lissencephaly                              | 743100 | Microphthalmos, laterality unk                         |
| 742250 | Microgyria                                            | 743101 | Microphthalmos, left eye                               |
| 742260 | Holoprosencephaly                                     | 743102 | Microphthalmos, right eye                              |
| 742270 | Arhinencephaly                                        | 743103 | Microphthalmos, unilateral NOS                         |
| 742280 | Other specified reduction defect of brain             | 743104 | Microphthalmos, both eyes                              |
| 742290 | Unspecified reduction defect of brain                 | 743200 | Buphthalmos, laterality unk                            |
| 742300 | Anomalies of aqueduct of Sylvius                      | 743201 | Buphthalmos, left eye                                  |
| 742310 | Dandy-Walker syndrome                                 | 743202 | Buphthalmos, right eye                                 |
| 742320 | Hydranencephaly                                       | 743203 | Buphthalmos, unilateral NOS                            |
| 742380 | Other specified hydrocephaly                          | 743204 | Buphthalmos, both eyes                                 |
| 742390 | Unspecified hydrocephaly                              | 743210 | Enlarged eye, NOS, laterality unk                      |
| 742400 | Enlarged brain or head                                | 743211 | Enlarged eye, NOS, left eye                            |
| 742410 | Porencephaly, laterality unk                          | 743212 | Enlarged eye, NOS, right eye                           |
| 742411 | Porencephaly, left side of brain                      | 743213 | Enlarged eye, NOS, unilateral NOS                      |
| 742412 | Porencephaly, right side of brain                     | 743214 | Enlarged eye, NOS, both eyes                           |
| 742413 | Porencephaly, unilateral NOS                          | 743220 | Enlarged cornea, laterality unk                        |
| 742414 | Porencephaly, both sides of brain                     | 743221 | Enlarged cornea, left eye                              |
| 742420 | Cerebral cyst, laterality unk                         | 743222 | Enlarged cornea, right eye                             |
| 742421 | Cerebral cyst, left side of brain                     | 743223 | Enlarged cornea, unilateral NOS                        |
| 742422 | Cerebral cyst, right side of brain                    | 743224 | Enlarged cornea, both eyes                             |
| 742423 | Cerebral cyst, unilateral NOS                         | 743300 | Lens - Absence, laterality unk                         |
| 742424 | Cerebral cyst, both sides of brain                    | 743301 | Lens - Absence, left eye                               |
| 742480 | Other specified anomalies of brain, laterality unk    | 743302 | Lens - Absence, right eye                              |
| 742481 | Other specified anomalies of brain, left              | 743303 | Lens - Absence, unilateral NOS                         |
| 742482 | Other specified anomalies of brain, right             | 743304 | Lens - Absence, both eyes                              |
| 742483 | Other specified anomalies of brain, unilateral NOS    | 743310 | Lens - Spherical, laterality unk                       |
| 742484 | Other specified anomalies of brain, bilateral         | 743311 | Lens - Spherical, left eye                             |
| 742485 | Ventricular cysts                                     | 743312 | Lens - Spherical, right eye                            |
| 742486 | Small brain                                           | 743313 | Lens - Spherical, unilateral NOS                       |
| 742500 | Amyelia                                               | 743314 | Lens - Spherical, both eyes                            |
| 742510 | Hypoplasia or dysplasia of spinal cord                | 743320 | Cataract - NOS, laterality unk                         |
| 742520 | Diastematomyelia                                      | 743321 | Cataract - NOS, left eye                               |
| 742530 | Other cauda equina anomalies                          | 743322 | Cataract - NOS, right eye                              |
| 742540 | Hydromyelia                                           | 743323 | Cataract - NOS, unilateral NOS                         |
|        |                                                       | 743324 | Cataract - NOS, both eyes                              |
|        |                                                       | 743325 | Cataract - Anterior polar                              |
|        |                                                       | 743326 | Cataract - Other specified                             |

**SUPPLEMENTAL MATERIAL**

Table S2: CDC/BPA Codes to Identify Non-Cardiac Congenital Anomalies

|        |                                                                            |        |                                                                            |
|--------|----------------------------------------------------------------------------|--------|----------------------------------------------------------------------------|
| 743330 | Lens - Displaced, laterality unk                                           | 743482 | Anterior segment - Other specified colobomas and anomalies, right eye      |
| 743331 | Lens - Displaced, left eye                                                 | 743483 | Anterior segment - Other specified colobomas and anomalies, unilateral NOS |
| 743332 | Lens - Displaced, right eye                                                | 743484 | Anterior segment - Other specified colobomas and anomalies, both eyes      |
| 743333 | Lens - Displaced, unilateral NOS                                           | 743490 | Anterior segment - Unspecified colobomas and anomalies, laterality unk     |
| 743334 | Lens - Displaced, both eyes                                                | 743491 | Anterior segment - Unspecified colobomas and anomalies, left eye           |
| 743340 | Lens - Coloboma, laterality unk                                            | 743492 | Anterior segment - Unspecified colobomas and anomalies, right eye          |
| 743341 | Lens - Coloboma, left eye                                                  | 743493 | Anterior segment - Unspecified colobomas and anomalies, unilateral NOS     |
| 743342 | Lens - Coloboma, right eye                                                 | 743494 | Anterior segment - Unspecified colobomas and anomalies, both eyes          |
| 743343 | Lens - Coloboma, unilateral                                                | 743500 | Vitreous humor - Specified anomalies, laterality unk                       |
| 743344 | Lens - Coloboma, both eyes                                                 | 743501 | Vitreous humor - Specified anomalies, left eye                             |
| 743380 | Lens - Other specified anomalies, laterality unk                           | 743502 | Vitreous humor - Specified anomalies, right eye                            |
| 743381 | Lens - Other specified anomalies, left eye                                 | 743503 | Vitreous humor - Specified anomalies, unilateral NOS                       |
| 743382 | Lens - Other specified anomalies, right eye                                | 743504 | Vitreous humor - Specified anomalies, both eyes                            |
| 743383 | Lens - Other specified anomalies, unilateral                               | 743510 | Retina - Specified anomalies, laterality unk                               |
| 743384 | Lens - Other specified anomalies, both eyes                                | 743511 | Retina - Specified anomalies, left eye                                     |
| 743390 | Lens - Unspecified anomalies, laterality unk                               | 743512 | Retina - Specified anomalies, right eye                                    |
| 743391 | Lens - Unspecified anomalies, left eye                                     | 743513 | Retina - Specified anomalies, unilateral NOS                               |
| 743392 | Lens - Unspecified anomalies, right eye                                    | 743514 | Retina - Specified anomalies, both eyes                                    |
| 743393 | Lens - Unspecified anomalies, unilateral NOS                               | 743520 | Optic disk - Specified anomalies, laterality unk                           |
| 743394 | Lens - Unspecified anomalies, both eyes                                    | 743521 | Optic disk - Specified anomalies, left eye                                 |
| 743400 | Cornea - Opacity, laterality unk                                           | 743522 | Optic disk - Specified anomalies, right eye                                |
| 743401 | Cornea - Opacity, left eye                                                 | 743523 | Optic disk - Specified anomalies, unilateral NOS                           |
| 743402 | Cornea - Opacity, right eye                                                | 743524 | Optic disk - Specified anomalies, both eyes                                |
| 743403 | Cornea - Opacity, unilateral NOS                                           | 743530 | Choroid - Specified anomalies, laterality unk                              |
| 743404 | Cornea - Opacity, both eyes                                                | 743531 | Choroid - Specified anomalies, left eye                                    |
| 743410 | Cornea - Other anomalies, laterality unk                                   | 743532 | Choroid - Specified anomalies, right eye                                   |
| 743411 | Cornea - Other anomalies, left eye                                         | 743533 | Choroid - Specified anomalies, unilateral NOS                              |
| 743412 | Cornea - Other anomalies, right eye                                        | 743534 | Choroid - Specified anomalies, both eyes                                   |
| 743413 | Cornea - Other anomalies, unilateral NOS                                   | 743535 | Choroid - Coloboma                                                         |
| 743414 | Cornea - Other anomalies, both eyes                                        | 743580 | Posterior segment - Other specified anomalies, laterality unk              |
| 743420 | Iris - Absence, laterality unk                                             | 743581 | Posterior segment - Other specified anomalies, left eye                    |
| 743421 | Iris - Absence, left eye                                                   | 743582 | Posterior segment - Other specified anomalies, right eye                   |
| 743422 | Iris - Absence, right eye                                                  | 743583 | Posterior segment - Other specified anomalies, unilateral NOS              |
| 743423 | Iris - Absence, unilateral NOS                                             | 743584 | Posterior segment - Other specified anomalies, both eyes                   |
| 743424 | Iris - Absence, both eyes                                                  | 743590 | Posterior segment - Unspecified anomalies, laterality unk                  |
| 743430 | Iris - Coloboma, laterality unk                                            |        |                                                                            |
| 743431 | Iris - Coloboma, left eye                                                  |        |                                                                            |
| 743432 | Iris - Coloboma, right eye                                                 |        |                                                                            |
| 743433 | Iris - Coloboma, unilateral NOS                                            |        |                                                                            |
| 743434 | Iris - Coloboma, both eyes                                                 |        |                                                                            |
| 743440 | Iris - Other anomalies, laterality unk                                     |        |                                                                            |
| 743441 | Iris - Other anomalies, left eye                                           |        |                                                                            |
| 743442 | Iris - Other anomalies, right eye                                          |        |                                                                            |
| 743443 | Iris - Other anomalies, unilateral NOS                                     |        |                                                                            |
| 743444 | Iris - Other anomalies, both eyes                                          |        |                                                                            |
| 743480 | Anterior segment - Other specified colobomas and anomalies, laterality unk |        |                                                                            |
| 743481 | Anterior segment - Other specified colobomas and anomalies, left eye       |        |                                                                            |



**SUPPLEMENTAL MATERIAL**

Table S2: CDC/BPA Codes to Identify Non-Cardiac Congenital Anomalies

|        |                                                           |        |                                                                     |
|--------|-----------------------------------------------------------|--------|---------------------------------------------------------------------|
| 743591 | Posterior segment - Unspecified anomalies, left eye       | 743674 | Anomalies of orbit, both eyes                                       |
| 743592 | Posterior segment - Unspecified anomalies, right eye      | 743800 | Eye - Other specified anomalies , laterality unk                    |
| 743593 | Posterior segment - Unspecified anomalies, unilateral NOS | 743801 | Eye - Other specified anomalies , left eye                          |
| 743594 | Posterior segment - Unspecified anomalies, both eye       | 743802 | Eye - Other specified anomalies , right eye                         |
| 743600 | Blepharoptosis, laterality unk                            | 743803 | Eye - Other specified anomalies , unilateral NOS                    |
| 743601 | Blepharoptosis, left eye                                  | 743804 | Eye - Other specified anomalies, both eyes                          |
| 743602 | Blepharoptosis, right eye                                 | 743810 | Epibulbar dermoid cyst, laterality unk                              |
| 743603 | Blepharoptosis, unilateral NOS                            | 743811 | Epibulbar dermoid cyst, left eye                                    |
| 743604 | Blepharoptosis, both eyes                                 | 743812 | Epibulbar dermoid cyst, right eye                                   |
| 743610 | Ectropion, laterality unk                                 | 743813 | Epibulbar dermoid cyst, unilateral NOS                              |
| 743611 | Ectropion, left eye                                       | 743814 | Epibulbar dermoid cyst, both eyes                                   |
| 743612 | Ectropion, right eye                                      | 743900 | Eye - Unspecified anomalies, laterality unk                         |
| 743613 | Ectropion, unilateral NOS                                 | 743901 | Eye - Unspecified anomalies, left eye                               |
| 743614 | Ectropion, both eyes                                      | 743902 | Eye - Unspecified anomalies, right eye                              |
| 743620 | Entropion, laterality unk                                 | 743903 | Eye - Unspecified anomalies, unilateral NOS                         |
| 743621 | Entropion, left eye                                       | 743904 | Eye - Unspecified anomalies, both eyes                              |
| 743622 | Entropion, right eye                                      | 744000 | Auditory canal - Absence or stricture, laterality unk               |
| 743623 | Entropion, unilateral NOS                                 | 744001 | Auditory canal - Absence or stricture, left ear                     |
| 743624 | Entropion, both eyes                                      | 744002 | Auditory canal - Absence or stricture, right ear                    |
| 743630 | Eyelids - Other anomalies, laterality unk                 | 744003 | Auditory canal - Absence or stricture, unilateral NOS               |
| 743631 | Eyelids - Other anomalies, left eye                       | 744004 | Auditory canal - Absence or stricture, both ears                    |
| 743632 | Eyelids - Other anomalies, right eye                      | 744010 | External ear - Absence, laterality unk                              |
| 743633 | Eyelids - Other anomalies, unilateral NOS                 | 744011 | External ear - Absence, left ear                                    |
| 743634 | Eyelids - Other anomalies, both eyes                      | 744012 | External ear - Absence, right ear                                   |
| 743635 | Blepharophimosis                                          | 744013 | External ear - Absence, unilateral NOS                              |
| 743636 | Eyelids - Coloboma                                        | 744014 | External ear - Absence, both ears                                   |
| 743640 | Lacrimal apparatus - Absence or agenesis, laterality unk  | 744020 | Middle ear - Anomaly, laterality unk                                |
| 743641 | Lacrimal apparatus - Absence or agenesis, left eye        | 744021 | Middle ear - Anomaly, left ear                                      |
| 743642 | Lacrimal apparatus - Absence or agenesis, right eye       | 744022 | Middle ear - Anomaly, right ear                                     |
| 743643 | Lacrimal apparatus - Absence or agenesis, unilateral NOS  | 744023 | Middle ear - Anomaly, unilateral NOS                                |
| 743644 | Lacrimal apparatus - Absence or agenesis, both eyes       | 744024 | Middle ear - Anomaly, both ears                                     |
| 743660 | Lacrimal duct - Other anomalies, laterality unk           | 744030 | Inner ear - Anomaly, laterality unk                                 |
| 743661 | Lacrimal duct - Other anomalies, left eye                 | 744031 | Inner ear - Anomaly, left ear                                       |
| 743662 | Lacrimal duct - Other anomalies, right eye                | 744032 | Inner ear - Anomaly, right ear                                      |
| 743663 | Lacrimal duct - Other anomalies, unilateral NOS           | 744033 | Inner ear - Anomaly, unilateral NOS                                 |
| 743664 | Lacrimal duct - Other anomalies, both eyes                | 744034 | Inner ear - Anomaly, both ears                                      |
| 743670 | Anomalies of orbit, laterality unk                        | 744090 | Ear - Unspecified anomalies with hearing impairment, laterality unk |
| 743671 | Anomalies of orbit, left eye                              | 744091 | Ear - Unspecified anomalies with hearing impairment, left ear       |
| 743672 | Anomalies of orbit, right eye                             | 744092 | Ear - Unspecified anomalies with hearing impairment, right ear      |
| 743673 | Anomalies of orbit, unilateral NOS                        | 744093 | Ear - Unspecified anomalies with hearing impairment, unilateral NOS |
|        |                                                           | 744094 | Ear - Unspecified anomalies with hearing impairment, both ears      |
|        |                                                           | 744100 | External ear - Accessory auricle or polyotia                        |
|        |                                                           | 744110 | Preauricular (in front of ear canal) appendage, tag, or lobule      |

**SUPPLEMENTAL MATERIAL**

Table S2: CDC/BPA Codes to Identify Non-Cardiac Congenital Anomalies

|        |                                                               |        |                                                               |
|--------|---------------------------------------------------------------|--------|---------------------------------------------------------------|
| 744120 | Other ear tag, appendage, lobule, or papilloma                | 744402 | Branchial cleft, sinus, fistula, cyst, or pit, right          |
| 744200 | Macrotia, laterality unk                                      | 744403 | Branchial cleft, sinus, fistula, cyst, or pit, unilateral NOS |
| 744201 | Macrotia, left ear                                            | 744404 | Branchial cleft, sinus, fistula, cyst, or pit, bilateral      |
| 744202 | Macrotia, right ear                                           | 744480 | Other branchial cleft anomalies, laterality unk               |
| 744203 | Macrotia, unilateral NOS                                      | 744481 | Other branchial cleft anomalies, left                         |
| 744204 | Macrotia, both ears                                           | 744482 | Other branchial cleft anomalies, right                        |
| 744210 | Microtia, laterality unk                                      | 744483 | Other branchial cleft anomalies, unilateral NOS               |
| 744211 | Microtia, left ear                                            | 744484 | Other branchial cleft anomalies, bilateral                    |
| 744212 | Microtia, right ear                                           | 744800 | Macrostomia                                                   |
| 744213 | Microtia, unilateral NOS                                      | 744810 | Microstomia                                                   |
| 744214 | Microtia, both ears                                           | 744880 | Other specified anomalies of face or neck, laterality unk     |
| 744230 | External ear - Other misshapen, laterality unk                | 744881 | Other specified anomalies of face or neck, left               |
| 744231 | External ear - Other misshapen, left ear                      | 744882 | Other specified anomalies of face or neck, right              |
| 744232 | External ear - Other misshapen, right ear                     | 744883 | Other specified anomalies of face or neck, unilateral NOS     |
| 744233 | External ear - Other misshapen, unilateral NOS                | 744884 | Other specified anomalies of face or neck, bilateral          |
| 744234 | External ear - Other misshapen, both ears                     | 744900 | Congenital anomaly of neck, NOS                               |
| 744240 | External ear - Misplaced, laterality unk                      | 744910 | Congenital anomaly of face, NOS                               |
| 744241 | External ear - Misplaced, left ear                            | 748000 | Choanal atresia, laterality unk                               |
| 744242 | External ear - Misplaced, right ear                           | 748001 | Choanal atresia, left                                         |
| 744243 | External ear - Misplaced, unilateral NOS                      | 748002 | Choanal atresia, right                                        |
| 744244 | External ear - Misplaced, both ears                           | 748003 | Choanal atresia, unilateral NOS                               |
| 744250 | Eustachian tube - Absence or anomaly, laterality unk          | 748004 | Choanal atresia, bilateral                                    |
| 744251 | Eustachian tube - Absence or anomaly, left ear                | 748100 | Nose - Agenesis or underdevelopment, laterality unk           |
| 744252 | Eustachian tube - Absence or anomaly, right ear               | 748101 | Nose - Agenesis or underdevelopment, left                     |
| 744253 | Eustachian tube - Absence or anomaly, unilateral NOS          | 748102 | Nose - Agenesis or underdevelopment, right                    |
| 744254 | Eustachian tube - Absence or anomaly, both ears               | 748103 | Nose - Agenesis or underdevelopment, unilateral NOS           |
| 744280 | Ear - Other specified anomalies, laterality unk               | 748104 | Nose - Agenesis or underdevelopment, bilateral                |
| 744281 | Ear - Other specified anomalies, left ear                     | 748110 | Nose - Accessory                                              |
| 744282 | Ear - Other specified anomalies, right ear                    | 748120 | Nose - Fissured, notched, or cleft, laterality unk            |
| 744283 | Ear - Other specified anomalies, unilateral NOS               | 748121 | Nose - Fissured, notched, or cleft, left                      |
| 744284 | Ear - Other specified anomalies, both ears                    | 748122 | Nose - Fissured, notched, or cleft, right                     |
| 744300 | Ear - Unspecified anomalies, laterality unk                   | 748123 | Nose - Fissured, notched, or cleft, unilateral NOS            |
| 744301 | Ear - Unspecified anomalies, left ear                         | 748124 | Nose - Fissured, notched, or cleft, bilateral                 |
| 744302 | Ear - Unspecified anomalies, right ear                        | 748130 | Sinus wall anomalies                                          |
| 744303 | Ear - Unspecified anomalies, unilateral NOS                   | 748140 | Nasal septum - Perforated                                     |
| 744304 | Ear - Unspecified anomalies, both ears                        | 748180 | Nose - Other specified anomalies, laterality unk              |
| 744400 | Branchial cleft, sinus, fistula, cyst, or pit, laterality unk | 748181 | Nose - Other specified anomalies, left                        |
| 744401 | Branchial cleft, sinus, fistula, cyst, or pit, left           | 748182 | Nose - Other specified anomalies, right                       |
|        |                                                               | 748183 | Nose - Other specified anomalies, unilateral NOS              |
|        |                                                               | 748184 | Nose - Other specified anomalies, bilateral                   |
|        |                                                               | 748185 | Nose - Tubular, single, proboscis                             |
|        |                                                               | 748190 | Nose - Unspecified anomalies                                  |
|        |                                                               | 748205 | Laryngeal web - Glottic                                       |
|        |                                                               | 748206 | Laryngeal web - Subglottic                                    |

**SUPPLEMENTAL MATERIAL**

Table S2: CDC/BPA Codes to Identify Non-Cardiac Congenital Anomalies

|        |                                                          |        |                                                                |
|--------|----------------------------------------------------------|--------|----------------------------------------------------------------|
| 748209 | Laryngeal web - Site unspecified                         | 748511 | Lung - Hypoplasia, left                                        |
| 748300 | Larynx and supporting cartilage - Other anomalies        | 748512 | Lung - Hypoplasia, right                                       |
| 748310 | Subglottic stenosis - Congenital                         | 748513 | Lung - Hypoplasia, unilateral NOS                              |
| 748330 | Trachea - Other anomalies                                | 748514 | Lung - Hypoplasia, bilateral                                   |
| 748340 | Bronchus - Stenosis, laterality unk                      | 748520 | Lung - Sequestration, laterality unk                           |
| 748341 | Bronchus - Stenosis, left                                | 748521 | Lung - Sequestration, left                                     |
| 748342 | Bronchus - Stenosis, right                               | 748522 | Lung - Sequestration, right                                    |
| 748343 | Bronchus - Stenosis, unilateral NOS                      | 748523 | Lung - Sequestration, unilateral NOS                           |
| 748344 | Bronchus - Stenosis, bilateral                           | 748524 | Lung - Sequestration, bilateral                                |
| 748350 | Bronchus - Other anomalies, laterality unk               | 748580 | Lung - Other specified dysplasia, laterality unk               |
| 748351 | Bronchus - Other anomalies, left                         | 748581 | Lung - Other specified dysplasia, left                         |
| 748352 | Bronchus - Other anomalies, right                        | 748582 | Lung - Other specified dysplasia, right                        |
| 748353 | Bronchus - Other anomalies, unilateral NOS               | 748583 | Lung - Other specified dysplasia, unilateral NOS               |
| 748354 | Bronchus - Other anomalies, bilateral                    | 748584 | Lung - Other specified dysplasia, bilateral                    |
| 748360 | Laryngeal stridor - Congenital                           | 748590 | Lung - Unspecified dysplasia, laterality unk                   |
| 748380 | Larynx, bronchus - Other specified anomalies             | 748591 | Lung - Unspecified dysplasia, left                             |
| 748385 | Larynx - Cleft                                           | 748592 | Lung - Unspecified dysplasia, right                            |
| 748390 | Larynx, trachea, bronchus - Unspecified anomalies        | 748593 | Lung - Unspecified dysplasia, unilateral NOS                   |
| 748400 | Lung - Single cyst, laterality unk                       | 748594 | Lung - Unspecified dysplasia, bilateral                        |
| 748401 | Lung - Single cyst, left                                 | 748600 | Lung - Ectopic tissue, laterality unk                          |
| 748402 | Lung - Single cyst, right                                | 748601 | Lung - Ectopic tissue, left                                    |
| 748403 | Lung - Single cyst, unilateral NOS                       | 748602 | Lung - Ectopic tissue, right                                   |
| 748410 | Lung - Multiple cysts, laterality unk                    | 748603 | Lung - Ectopic tissue, unilateral NOS                          |
| 748411 | Lung - Multiple cysts, left                              | 748604 | Lung - Ectopic tissue, bilateral                               |
| 748412 | Lung - Multiple cysts, right                             | 748610 | Bronchiectasis, laterality unk                                 |
| 748413 | Lung - Multiple cysts, unilateral NOS                    | 748611 | Bronchiectasis, left                                           |
| 748414 | Lung - Multiple cysts, bilateral                         | 748612 | Bronchiectasis, right                                          |
| 748420 | Lung - Honeycomb, laterality unk                         | 748613 | Bronchiectasis, unilateral NOS                                 |
| 748421 | Lung - Honeycomb, left                                   | 748614 | Bronchiectasis, bilateral                                      |
| 748422 | Lung - Honeycomb, right                                  | 748620 | Lung - Accessory lobe, laterality unk                          |
| 748423 | Lung - Honeycomb, unilateral NOS                         | 748621 | Lung - Accessory lobe, left                                    |
| 748424 | Lung - Honeycomb, bilateral                              | 748622 | Lung - Accessory lobe, right                                   |
| 748480 | Lung - Other specified congenital cystic, laterality unk | 748623 | Lung - Accessory lobe, unilateral NOS                          |
| 748481 | Lung - Other specified congenital cystic, left           | 748624 | Lung - Accessory lobe, bilateral                               |
| 748482 | Lung - Other specified congenital cystic, right          | 748625 | Bilobar right lung                                             |
| 748483 | Lung - Other specified congenital cystic, unilateral NOS | 748690 | Lung - Other and unspecified anomalies, laterality unk         |
| 748484 | Lung - Other specified congenital cystic, bilateral      | 748691 | Lung - Other and unspecified anomalies, left                   |
| 748500 | Lung - Agenesis or aplasia, laterality unk               | 748692 | Lung - Other and unspecified anomalies, right                  |
| 748501 | Lung - Agenesis or aplasia, left                         | 748693 | Lung - Other and unspecified anomalies, unilateral NOS         |
| 748502 | Lung - Agenesis or aplasia, right                        | 748694 | Lung - Other and unspecified anomalies, bilateral              |
| 748503 | Lung - Agenesis or aplasia, unilateral NOS               | 748800 | Pleural anomaly, laterality unk                                |
| 748504 | Lung - Agenesis or aplasia, bilateral                    | 748801 | Pleural anomaly, left                                          |
| 748510 | Lung - Hypoplasia, laterality unk                        | 748802 | Pleural anomaly, right                                         |
|        |                                                          | 748803 | Pleural anomaly, unilateral NOS                                |
|        |                                                          | 748804 | Pleural anomaly, bilateral                                     |
|        |                                                          | 748810 | Mediastinum - Congenital cyst                                  |
|        |                                                          | 748880 | Respiratory system - Other specified anomalies, laterality unk |

**SUPPLEMENTAL MATERIAL**

Table S2: CDC/BPA Codes to Identify Non-Cardiac Congenital Anomalies

|        |                                                                    |        |                                                                    |
|--------|--------------------------------------------------------------------|--------|--------------------------------------------------------------------|
| 748881 | Respiratory system - Other specified anomalies, left               | 750310 | Esophageal atresia - With tracheoesophageal (T-E) fistula (TEF)    |
| 748882 | Respiratory system - Other specified anomalies, right              | 750320 | Tracheoesophageal (T-E) fistula (TEF) - Without esophageal atresia |
| 748883 | Respiratory system - Other specified anomalies, unilateral NOS     | 750325 | Tracheoesophageal (T-E) fistula (TEF) - "H" type                   |
| 748884 | Respiratory system - Other specified anomalies, bilateral          | 750330 | Bronchoesophageal fistula - With or without esophageal atresia     |
| 748900 | Respiratory system - Unspecified anomalies                         | 750340 | Esophagus - Stenosis or stricture                                  |
| 749000 | Cleft hard palate - Unilateral, without cleft lip                  | 750350 | Esophageal web                                                     |
| 749010 | Cleft hard palate - Bilateral, without cleft lip                   | 750380 | Trachea and esophagus - Other anomalies                            |
| 749020 | Cleft hard palate - Central, without cleft lip                     | 750400 | Esophagus - Congenital dilatation                                  |
| 749030 | Cleft hard palate - NOS, without cleft lip                         | 750410 | Esophagus - Displaced                                              |
| 749040 | Cleft soft palate - Unilateral, without cleft lip                  | 750420 | Esophagus - Diverticulum                                           |
| 749050 | Cleft soft palate - Bilateral, without cleft lip                   | 750430 | Esophagus - Duplication                                            |
| 749060 | Cleft soft palate - Central, without cleft lip                     | 750480 | Esophagus - Other specified anomalies                              |
| 749070 | Cleft soft palate - NOS, without cleft lip                         | 750510 | Pyloric stenosis - Congenital hypertrophic                         |
| 749080 | Cleft uvula, without cleft lip                                     | 750580 | Pyloric obstruction - Other congenital                             |
| 749090 | Cleft palate - NOS, hard or soft not specified, without cleft lip  | 750600 | Hiatal hernia - Congenital                                         |
| 749100 | Cleft lip - Unilateral, without cleft palate                       | 750700 | Stomach - Microgastria                                             |
| 749110 | Cleft lip - Bilateral, without cleft palate                        | 750710 | Stomach - Megalogastric                                            |
| 749120 | Cleft lip - Central, without cleft palate                          | 750720 | Stomach - Cardiospasm                                              |
| 749190 | Cleft lip - NOS, without cleft palate                              | 750730 | Stomach - Displacement or transposition                            |
| 749200 | Cleft lip - Unilateral, with any cleft palate                      | 750740 | Stomach - Diverticulum                                             |
| 749210 | Cleft lip - Bilateral, with any cleft palate                       | 750750 | Stomach - Duplication                                              |
| 749220 | Cleft lip - Central, with any cleft palate                         | 750780 | Stomach - Other specified anomalies                                |
| 749290 | Cleft lip - NOS, with any cleft palate                             | 750800 | Upper alimentary tract - Other specified anomalies                 |
| 750000 | Ankyloglossia                                                      | 750900 | Mouth and pharynx - Unspecified anomalies                          |
| 750100 | Tongue - Absence                                                   | 750910 | Esophagus - Unspecified anomalies                                  |
| 750110 | Tongue - Small                                                     | 750920 | Stomach - Unspecified anomalies                                    |
| 750120 | Tongue - Large                                                     | 750990 | Upper alimentary tract - Unspecified anomalies                     |
| 750130 | Tongue - Dislocation or displacement                               | 751000 | Omphalomesenteric duct - persistent                                |
| 750140 | Tongue - Cleft or split                                            | 751100 | Duodenum - Stenosis, atresia or absence                            |
| 750180 | Tongue - Other specified anomalies                                 | 751110 | Jejunum - Stenosis, atresia or absence of jejunum                  |
| 750190 | Tongue - Unspecified anomalies                                     | 751120 | Ileum - Stenosis, atresia or absence                               |
| 750200 | Pharyngeal pouch                                                   | 751190 | Small intestine, NOS - Stenosis, atresia or absence                |
| 750210 | Pharynx - Other anomalies                                          | 751195 | Small intestine, NOS - Stenosis, atresia or absence, with fistula  |
| 750230 | Salivary glands or ducts - Other anomalies                         | 751200 | Large intestine - Stenosis, atresia or absence                     |
| 750250 | Palate - Other anomalies                                           | 751210 | Rectum - Stenosis, atresia or absence, with fistula                |
| 750260 | Lip - fistulae or pits                                             | 751220 | Rectum - Stenosis, atresia or absence without mention of fistula   |
| 750270 | Lip - Other anomalies                                              | 751230 | Anus - Stenosis, atresia or absence, with fistula                  |
| 750280 | Mouth and pharynx - Other specified anomalies                      | 751240 | Anus - Stenosis, atresia or absence, without mention of fistula    |
| 750300 | Esophageal atresia - Without tracheoesophageal (T-E) fistula (TEF) | 751300 | Hirschsprung's disease - Total intestinal aganglionosis            |

**SUPPLEMENTAL MATERIAL**

Table S2: CDC/BPA Codes to Identify Non-Cardiac Congenital Anomalies

|        |                                                                                                                 |        |                                                                  |
|--------|-----------------------------------------------------------------------------------------------------------------|--------|------------------------------------------------------------------|
| 751310 | Hirschsprung's disease - Long-segment (aganglionosis beyond the rectum)                                         | 752003 | Ovary - Absence or agenesis, unilateral NOS                      |
| 751320 | Hirschsprung's disease - Short-segment (aganglionosis involving no more than the anal sphincter and the rectum) | 752004 | Ovary - Absence or agenesis, bilateral                           |
| 751330 | Hirschsprung's disease - NOS                                                                                    | 752010 | Ovary - Streak, laterality unk                                   |
| 751340 | Megacolon - congenital                                                                                          | 752011 | Ovary - Streak, left                                             |
| 751400 | Malrotation - cecum and/or colon                                                                                | 752012 | Ovary - Streak, right                                            |
| 751410 | Mesentery anomalies                                                                                             | 752013 | Ovary - Streak, unilateral NOS                                   |
| 751420 | Congenital adhesions or bands of omentum and peritoneum                                                         | 752014 | Ovary - Streak, bilateral                                        |
| 751490 | Malrotation - Other specified and unspecified                                                                   | 752020 | Ovary - Accessory, laterality unk                                |
| 751495 | Malrotation - small intestine only                                                                              | 752021 | Ovary - Accessory, left                                          |
| 751500 | Duplication of anus, rectum, appendix, cecum, or intestine                                                      | 752022 | Ovary - Accessory, right                                         |
| 751510 | Transposition of appendix, colon, or intestine                                                                  | 752023 | Ovary - Accessory, unilateral NOS                                |
| 751520 | Microcolon                                                                                                      | 752024 | Ovary - Accessory, bilateral                                     |
| 751530 | Anus - Ectopic                                                                                                  | 752080 | Ovary - Other specified anomalies, laterality unk                |
| 751540 | Anal fistula - Congenital                                                                                       | 752081 | Ovary - Other specified anomalies, left                          |
| 751550 | Cloaca - Persistent cloaca                                                                                      | 752082 | Ovary - Other specified anomalies, right                         |
| 751555 | Cloaca - Exstrophy                                                                                              | 752083 | Ovary - Other specified anomalies, unilateral NOS                |
| 751560 | Duodenum - Web                                                                                                  | 752084 | Ovary - Other specified anomalies, bilateral                     |
| 751580 | Intestine - Other specified anomalies                                                                           | 752085 | Ovary - Multiple cysts                                           |
| 751590 | Intestine - Unspecified anomalies                                                                               | 752090 | Ovary - Unspecified anomalies, laterality unk                    |
| 751600 | Liver - Absence or agenesis, total or partial                                                                   | 752091 | Ovary - Unspecified anomalies, left                              |
| 751610 | Liver - Cystic or fibrocystic disease                                                                           | 752092 | Ovary - Unspecified anomalies, right                             |
| 751620 | Liver - Other anomalies                                                                                         | 752093 | Ovary - Unspecified anomalies, unilateral NOS                    |
| 751630 | Gallbladder - Agenesis or hypoplasia                                                                            | 752094 | Ovary - Unspecified anomalies, bilateral                         |
| 751640 | Gallbladder - Other anomalies                                                                                   | 752100 | Fallopian tube - Absent, laterality unk                          |
| 751650 | Hepatic or bile ducts - Agenesis or atresia                                                                     | 752101 | Fallopian tube - Absent, left                                    |
| 751660 | Choledochal cyst                                                                                                | 752102 | Fallopian tube - Absent, right                                   |
| 751670 | Hepatic or bile ducts - Other anomalies                                                                         | 752103 | Fallopian tube - Absent, unilateral NOS                          |
| 751680 | Biliary tract - Other anomalies                                                                                 | 752104 | Fallopian tube - Absent, bilateral                               |
| 751700 | Pancreas - Absence, agenesis or hypoplasia                                                                      | 752110 | Cyst - Mesenteric remnant                                        |
| 751710 | Pancreas - accessory                                                                                            | 752120 | Cyst - Fimbrial cyst, laterality unk                             |
| 751720 | Pancreas - Annular                                                                                              | 752121 | Cyst - Fimbrial cyst, left                                       |
| 751730 | Pancreas - Ectopic                                                                                              | 752122 | Cyst - Fimbrial cyst, right                                      |
| 751740 | Pancreas - Cyst                                                                                                 | 752123 | Cyst - Fimbrial cyst, unilateral NOS                             |
| 751780 | Pancreas - Other specified anomalies                                                                            | 752124 | Cyst - Fimbrial cyst, bilateral                                  |
| 751790 | Pancreas - Unspecified anomalies                                                                                | 752190 | Fallopian tube - Other and unspecified anomalies, laterality unk |
| 751800 | Alimentary tract - Absence, complete or partial, NOS                                                            | 752191 | Fallopian tube - Other and unspecified anomalies, left           |
| 751810 | Alimentary tract - Duplication, NOS                                                                             | 752192 | Fallopian tube - Other and unspecified anomalies, right          |
| 751880 | Digestive system - Other specified anomalies                                                                    | 752193 | Fallopian tube - Other and unspecified anomalies, unilateral NOS |
| 751900 | Digestive system - Unspecified anomalies                                                                        | 752194 | Fallopian tube - Other and unspecified anomalies, bilateral      |
| 752000 | Ovary - Absence or agenesis, laterality unk                                                                     | 752200 | Uterus - Double                                                  |
| 752001 | Ovary - Absence or agenesis, left                                                                               | 752300 | Uterus - Absence or agenesis                                     |
| 752002 | Ovary - Absence or agenesis, right                                                                              | 752310 | Uterus - Displaced                                               |
|        |                                                                                                                 | 752320 | Uterus - Fistula with digestive or urinary tract                 |
|        |                                                                                                                 | 752380 | Uterus - Other anomalies                                         |
|        |                                                                                                                 | 752390 | Uterus - Unspecified anomalies                                   |

**SUPPLEMENTAL MATERIAL**

Table S2: CDC/BPA Codes to Identify Non-Cardiac Congenital Anomalies

|        |                                                                           |        |                                                                         |
|--------|---------------------------------------------------------------------------|--------|-------------------------------------------------------------------------|
| 752400 | Cervix - Absence, atresia or agenesis                                     | 752804 | Testicle - Absent, bilateral                                            |
| 752410 | Vagina - Absence or atresia                                               | 752810 | Testicle and scrotum - Aplasia, laterality unk                          |
| 752420 | Fistula - Congenital rectovaginal                                         | 752811 | Testicle and scrotum - Aplasia, left                                    |
| 752440 | Vulva - Absence or other anomaly                                          | 752812 | Testicle and scrotum - Aplasia, right                                   |
| 752450 | Clitoris - Absence or other anomaly                                       | 752813 | Testicle and scrotum - Aplasia, unilateral NOS                          |
| 752470 | Vagina - Other cyst                                                       | 752814 | Testicle and scrotum - Aplasia, bilateral                               |
| 752480 | External female genitalia - Other specified anomalies                     | 752820 | Testicle and scrotum - Other anomalies                                  |
| 752490 | External female genitalia - Unspecified anomalies                         | 752830 | Vas deferens - Atresia, laterality unk                                  |
| 752500 | Testicle - Undescended or unpalpable, unilateral NOS                      | 752831 | Vas deferens - Atresia, left                                            |
| 752501 | Testicle - Undescended or unpalpable, left                                | 752832 | Vas deferens - Atresia, right                                           |
| 752502 | Testicle - Undescended or unpalpable, right                               | 752833 | Vas deferens - Atresia, unilateral NOS                                  |
| 752514 | Testicle - Undescended or unpalpable, bilateral                           | 752834 | Vas deferens - Atresia, bilateral                                       |
| 752520 | Testicle - Undescended or unpalpable, laterality unk                      | 752840 | Vas deferens and prostate - Other anomalies                             |
| 752530 | Testicle - Ectopic, laterality unk                                        | 752850 | Penis - Absence or aplasia                                              |
| 752531 | Testicle - Ectopic, left                                                  | 752860 | Penis - Other anomalies                                                 |
| 752532 | Testicle - Ectopic, right                                                 | 752865 | Penis - small or hypoplastic                                            |
| 752533 | Testicle - Ectopic, unilateral NOS                                        | 752870 | Cysts of embryonic remnants                                             |
| 752534 | Testicle - Ectopic, bilateral                                             | 752880 | Genital organs, male - Other specified anomalies                        |
| 752600 | Hypospadias without chordee - Degree not specified                        | 752900 | Genital organs, male - Unspecified anomalies                            |
| 752605 | Hypospadias without chordee - First-degree (glandular or coronal)         | 753000 | Kidneys - Absence, agenesis, dysplasia, or hypoplasia - Bilateral       |
| 752606 | Hypospadias without chordee - Second-degree (penile)                      | 753009 | Kidneys - Absence, agenesis, dysplasia, or hypoplasia - NOS             |
| 752607 | Hypospadias without chordee - Third-degree (perineal or scrotal)          | 753010 | Kidney - Absence, agenesis, dysplasia, or hypoplasia, laterality unk    |
| 752610 | Epispadias                                                                | 753011 | Kidney - Absence, agenesis, dysplasia, or hypoplasia, unilateral, left  |
| 752620 | Chordee, congenital, with hypospadias - Degree not specified              | 753012 | Kidney - Absence, agenesis, dysplasia, or hypoplasia, unilateral, right |
| 752621 | Chordee, congenital, alone (no hypospadias)                               | 753013 | Kidney - Absence, agenesis, dysplasia, or hypoplasia, unilateral, NOS   |
| 752625 | Chordee, congenital, with first-degree hypospadias (glandular or coronal) | 753100 | Kidney - Single cyst, laterality unk                                    |
| 752626 | Chordee, congenital, with second-degree hypospadias (penile)              | 753101 | Kidney - Single cyst, left                                              |
| 752627 | Chordee, congenital, with third-degree hypospadias (perineal or scrotal)  | 753102 | Kidney - Single cyst, right                                             |
| 752700 | True hermaphroditism                                                      | 753103 | Kidney - Single cyst, unilateral NOS                                    |
| 752710 | Pseudohermaphroditism in a male                                           | 753110 | Kidneys, polycystic - Infantile type, laterality unk                    |
| 752720 | Pseudohermaphroditism in a female                                         | 753111 | Kidneys, polycystic - Infantile type, left                              |
| 752730 | Pseudohermaphroditism, sex not specified                                  | 753112 | Kidneys, polycystic - Infantile type, right                             |
| 752790 | Indeterminate sex, NOS                                                    | 753113 | Kidneys, polycystic - Infantile type, unilateral NOS                    |
| 752800 | Testicle - Absent, laterality unk                                         | 753114 | Kidneys, polycystic - Infantile type, bilateral                         |
| 752801 | Testicle - Absent, left                                                   | 753120 | Kidneys, polycystic - Adult type, Laterality Unk                        |
| 752802 | Testicle - Absent, right                                                  | 753121 | Kidneys, polycystic - Adult type, Left                                  |
| 752803 | Testicle - Absent, unilateral NOS                                         | 753122 | Kidneys, polycystic - Adult type, Right                                 |
|        |                                                                           | 753123 | Kidneys, polycystic - Adult type, Unilateral NOS                        |
|        |                                                                           | 753124 | Kidneys, polycystic - Adult type, Bilateral                             |
|        |                                                                           | 753130 | Kidneys, polycystic -Type not specified, Laterality Unk                 |
|        |                                                                           | 753131 | Kidneys, polycystic - Type not specified, Left                          |
|        |                                                                           | 753132 | Kidneys, polycystic - Type not specified, Right                         |

**SUPPLEMENTAL MATERIAL**

Table S2: CDC/BPA Codes to Identify Non-Cardiac Congenital Anomalies

|        |                                                                   |        |                                                                                     |
|--------|-------------------------------------------------------------------|--------|-------------------------------------------------------------------------------------|
| 753133 | Kidneys, polycystic - Type not specified, Unilateral NOS          | 753214 | Ureter - Atresia, stricture, or stenosis, Bilateral                                 |
| 753134 | Kidneys, polycystic - Type not specified, Bilateral               | 753220 | Megaloureter, NOS, Laterality Unk                                                   |
| 753140 | Kidneys, medullary cystic disease - Juvenile type, Laterality Unk | 753221 | Megaloureter, NOS, Left                                                             |
| 753141 | Kidneys, medullary cystic disease - Juvenile type, Left           | 753222 | Megaloureter, NOS, Right                                                            |
| 753142 | Kidneys, medullary cystic disease - Juvenile type, Right          | 753223 | Megaloureter, NOS, Unilateral NOS                                                   |
| 753143 | Kidneys, medullary cystic disease - Juvenile type, Unilateral NOS | 753224 | Megaloureter, NOS, Bilateral                                                        |
| 753144 | Kidneys, medullary cystic disease - Juvenile type, Bilateral      | 753290 | Renal pelvis and ureter - Other and unspecified obstructive defects, Laterality Unk |
| 753150 | Kidneys, medullary cystic disease - Adult type, Laterality Unk    | 753291 | Renal pelvis and ureter - Other and unspecified obstructive defects, Left           |
| 753151 | Kidneys, medullary cystic disease - Adult type, Left              | 753292 | Renal pelvis and ureter - Other and unspecified obstructive defects, Right          |
| 753152 | Kidneys, medullary cystic disease - Adult type, Right             | 753293 | Renal pelvis and ureter - Other and unspecified obstructive defects, Unilateral NOS |
| 753153 | Kidneys, medullary cystic disease - Adult type, Unilateral NOS    | 753294 | Renal pelvis and ureter - Other and unspecified obstructive defects, Bilateral      |
| 753154 | Kidneys, medullary cystic disease - Adult type, Bilateral         | 753300 | Kidney - Accessory kidney, Laterality Unk                                           |
| 753160 | Kidneys, multicystic dysplasia, Laterality Unk                    | 753301 | Kidney - Accessory kidney, Left                                                     |
| 753161 | Kidneys, multicystic dysplasia, Left                              | 753302 | Kidney - Accessory kidney, Right                                                    |
| 753162 | Kidneys, multicystic dysplasia, Right                             | 753303 | Kidney - Accessory kidney, Unilateral NOS                                           |
| 753163 | Kidneys, multicystic dysplasia, Unilateral NOS                    | 753304 | Kidney - Accessory kidney, Bilateral                                                |
| 753164 | Kidneys, multicystic dysplasia, Bilateral                         | 753310 | Kidney - Double or triple, Laterality Unk                                           |
| 753180 | Kidneys, cystic - Other specified types, Laterality Unk           | 753311 | Kidney - Double or triple, Left                                                     |
| 753181 | Kidneys, cystic - Other specified types, Left                     | 753312 | Kidney - Double or triple, Right                                                    |
| 753182 | Kidneys, cystic - Other specified types, Right                    | 753313 | Kidney - Double or triple, Unilateral NOS                                           |
| 753183 | Kidneys, cystic - Other specified types, Unilateral NOS           | 753314 | Kidney - Double or triple, Bilateral                                                |
| 753184 | Kidneys, cystic - Other specified types, Bilateral                | 753320 | Kidney - Lobulated, fused, or horseshoe, Laterality Unk                             |
| 753200 | Hydronephrosis, congenital, Laterality Unk                        | 753321 | Kidney - Lobulated, fused, or horseshoe, Left                                       |
| 753201 | Hydronephrosis, congenital, Left                                  | 753322 | Kidney - Lobulated, fused, or horseshoe, Right                                      |
| 753202 | Hydronephrosis, congenital, Right                                 | 753323 | Kidney - Lobulated, fused, or horseshoe, Unilateral NOS                             |
| 753203 | Hydronephrosis, congenital, Unilateral NOS                        | 753324 | Kidney - Lobulated, fused, or horseshoe, Bilateral                                  |
| 753204 | Hydronephrosis, congenital, Bilateral                             | 753330 | Kidney - Ectopic, Laterality Unk                                                    |
| 753210 | Ureter - Atresia, stricture, or stenosis, Laterality Unk          | 753331 | Kidney - Ectopic, Left                                                              |
| 753211 | Ureter - Atresia, stricture, or stenosis, Left                    | 753332 | Kidney - Ectopic, Right                                                             |
| 753212 | Ureter - Atresia, stricture, or stenosis, Right                   | 753333 | Kidney - Ectopic, Unilateral NOS                                                    |
| 753213 | Ureter - Atresia, stricture, or stenosis, Unilateral NOS          | 753334 | Kidney - Ectopic, Bilateral                                                         |
|        |                                                                   | 753340 | Kidney - Enlarged, hyperplastic, or giant, Unilaterality Unk                        |
|        |                                                                   | 753341 | Kidney - Enlarged, hyperplastic, or giant, Left                                     |
|        |                                                                   | 753342 | Kidney - Enlarged, hyperplastic, or giant, Right                                    |
|        |                                                                   | 753343 | Kidney - Enlarged, hyperplastic, or giant, Unilateral NOS                           |
|        |                                                                   | 753344 | Kidney - Enlarged, hyperplastic, or giant, Bilateral                                |
|        |                                                                   | 753350 | Renal calculi, congenital, Laterality Unk                                           |
|        |                                                                   | 753351 | Renal calculi, congenital, Left                                                     |
|        |                                                                   | 753352 | Renal calculi, congenital, Right                                                    |
|        |                                                                   | 753353 | Renal calculi, congenital, Unilateral NOS                                           |
|        |                                                                   | 753354 | Renal calculi, congenital, Bilateral                                                |

**SUPPLEMENTAL MATERIAL**

Table S2: CDC/BPA Codes to Identify Non-Cardiac Congenital Anomalies

|        |                                                              |        |                                                                      |
|--------|--------------------------------------------------------------|--------|----------------------------------------------------------------------|
| 753380 | Kidney - Other specified anomalies, Laterality Unk           | 753383 | Kidney - Other specified anomalies, Unilateral NOS                   |
| 753381 | Kidney - Other specified anomalies, Left                     | 753384 | Kidney - Other specified anomalies, Bilateral                        |
| 753382 | Kidney - Other specified anomalies, Right                    | 753400 | Ureter - Absent, Laterality Unk                                      |
| 753383 | Kidney - Other specified anomalies, Unilateral NOS           | 753401 | Ureter - Absent, Left                                                |
| 753384 | Kidney - Other specified anomalies, Bilateral                | 753402 | Ureter - Absent, Right                                               |
| 753400 | Ureter - Absent, Laterality Unk                              | 753403 | Ureter - Absent, Unilateral NOS                                      |
| 753401 | Ureter - Absent, Left                                        | 753404 | Ureter - Absent, Bilateral                                           |
| 753402 | Ureter - Absent, Right                                       | 753410 | Ureter - Accessory, Laterality Unk                                   |
| 753403 | Ureter - Absent, Unilateral NOS                              | 753411 | Ureter - Accessory, Left                                             |
| 753404 | Ureter - Absent, Bilateral                                   | 753412 | Ureter - Accessory, Right                                            |
| 753410 | Ureter - Accessory, Laterality Unk                           | 753413 | Ureter - Accessory, Unilateral NOS                                   |
| 753411 | Ureter - Accessory, Left                                     | 753414 | Ureter - Accessory, Bilateral                                        |
| 753412 | Ureter - Accessory, Right                                    | 753420 | Ureter - Ectopic, Laterality Unk                                     |
| 753413 | Ureter - Accessory, Unilateral NOS                           | 753421 | Ureter - Ectopic, Left                                               |
| 753414 | Ureter - Accessory, Bilateral                                | 753422 | Ureter - Ectopic, Right                                              |
| 753320 | Kidney - Lobulated, fused, or horseshoe, Laterality Unk      | 753423 | Ureter - Ectopic, Unilateral NOS                                     |
| 753321 | Kidney - Lobulated, fused, or horseshoe, Left                | 753424 | Ureter - Ectopic, Bilateral                                          |
| 753322 | Kidney - Lobulated, fused, or horseshoe, Right               | 753480 | Ureter - Other specified anomalies, Laterality Unk                   |
| 753323 | Kidney - Lobulated, fused, or horseshoe, Unilateral NOS      | 753481 | Ureter - Other specified anomalies, Left                             |
| 753324 | Kidney - Lobulated, fused, or horseshoe, Bilateral           | 753482 | Ureter - Other specified anomalies, Right                            |
| 753330 | Kidney - Ectopic, Laterality Unk                             | 753483 | Ureter - Other specified anomalies, Unilateral NOS                   |
| 753331 | Kidney - Ectopic, Left                                       | 753484 | Ureter - Other specified anomalies, Bilateral                        |
| 753332 | Kidney - Ectopic, Right                                      | 753485 | Vesicoureteral reflux                                                |
| 753333 | Kidney - Ectopic, Unilateral NOS                             | 753500 | Exstrophy of urinary bladder                                         |
| 753334 | Kidney - Ectopic, Bilateral                                  | 753600 | Posterior urethral valves, congenital                                |
| 753340 | Kidney - Enlarged, hyperplastic, or giant, Unilaterality Unk | 753610 | Bladder - Other atresia, or stenosis of neck                         |
| 753341 | Kidney - Enlarged, hyperplastic, or giant, Left              | 753620 | Urethra - Anterior obstruction, atresia or stenosis                  |
| 753342 | Kidney - Enlarged, hyperplastic, or giant, Right             | 753630 | Urinary meatus - Obstruction, atresia or stenosis                    |
| 753343 | Kidney - Enlarged, hyperplastic, or giant, Unilateral NOS    | 753690 | Urethra and bladder neck - Other and unspecified atresia or stenosis |
| 753344 | Kidney - Enlarged, hyperplastic, or giant, Bilateral         | 753700 | Urachus - Patent                                                     |
| 753350 | Renal calculi, congenital, Laterality Unk                    | 753710 | Urachus - Cyst                                                       |
| 753351 | Renal calculi, congenital, Left                              | 753790 | Urachus - Other and unspecified anomaly                              |
| 753352 | Renal calculi, congenital, Right                             | 753800 | Bladder or urethra - Absent                                          |
| 753353 | Renal calculi, congenital, Unilateral NOS                    | 753810 | Bladder - Ectopic                                                    |
| 753354 | Renal calculi, congenital, Bilateral                         | 753820 | Bladder - Congenital diverticulum or hernia                          |
| 753380 | Kidney - Other specified anomalies, Laterality Unk           | 753830 | Bladder - Congenital prolapse                                        |
| 753381 | Kidney - Other specified anomalies, Left                     | 753840 | Urethra or urinary meatus - Double                                   |
| 753382 | Kidney - Other specified anomalies, Right                    | 753850 | Urethra or urethral orifice - Ectopic                                |
|        |                                                              | 753860 | Fistula of digestive-urinary tract, congenital                       |
|        |                                                              | 753870 | Fistula of urethra, NOS                                              |
|        |                                                              | 753880 | Bladder and urethra - Other specified anomalies                      |
|        |                                                              | 753900 | Kidney - Unspecified anomaly, Laterality Unk                         |
|        |                                                              | 753901 | Kidney - Unspecified anomaly, Left                                   |
|        |                                                              | 753902 | Kidney - Unspecified anomaly, Right                                  |
|        |                                                              | 753903 | Kidney - Unspecified anomaly, Unilateral NOS                         |
|        |                                                              | 753904 | Kidney - Unspecified anomaly, Bilateral                              |



**SUPPLEMENTAL MATERIAL**

Table S2: CDC/BPA Codes to Identify Non-Cardiac Congenital Anomalies

|        |                                                        |        |                                                      |
|--------|--------------------------------------------------------|--------|------------------------------------------------------|
| 753910 | Ureter - Unspecified anomaly, Laterality Unk           | 754403 | Femur - Bowed, Unilateral NOS                        |
| 753911 | Ureter - Unspecified anomaly, Left                     | 754404 | Femur - Bowed, Bilateral                             |
| 753912 | Ureter - Unspecified anomaly, Right                    | 754410 | Tibia and/or fibula - Bowed, Laterality Unk          |
| 753913 | Ureter - Unspecified anomaly, Unilateral NOS           | 754411 | Tibia and/or fibula - Bowed, Left                    |
| 753914 | Ureter - Unspecified anomaly, Bilateral                | 754412 | Tibia and/or fibula - Bowed, Right                   |
| 753920 | Bladder - Unspecified anomaly                          | 754413 | Tibia and/or fibula - Bowed, Unilateral NOS          |
| 753930 | Urethra - Unspecified anomaly                          | 754414 | Tibia and/or fibula - Bowed, Bilateral               |
| 753990 | Urinary system - Unspecified anomaly, NOS              | 754420 | Legs - Bowed, NOS, Laterality Unk                    |
| 754000 | Face - Asymmetry                                       | 754421 | Legs - Bowed, NOS, Left                              |
| 754010 | Facies - Compression                                   | 754422 | Legs - Bowed, NOS, Right                             |
| 754030 | Dolichocephaly                                         | 754423 | Legs - Bowed, NOS, Unilateral NOS                    |
| 754040 | Skull - Depressions                                    | 754424 | Legs - Bowed, NOS, Bilateral                         |
| 754050 | Plagiocephaly, laterality unk                          | 754430 | Genu recurvatum, Laterality Unk                      |
| 754051 | Plagiocephaly, left                                    | 754431 | Genu recurvatum, Left                                |
| 754052 | Plagiocephaly, right                                   | 754432 | Genu recurvatum, Right                               |
| 754053 | Plagiocephaly, unilateral NOS                          | 754433 | Genu recurvatum, Unilateral NOS                      |
| 754054 | Plagiocephaly, bilateral                               | 754434 | Genu recurvatum, Bilateral                           |
| 754055 | Asymmetric head                                        | 754440 | Knee - Congenital dislocation, Laterality Unk        |
| 754060 | Scaphocephaly                                          | 754441 | Knee - Congenital dislocation, Left                  |
| 754070 | Trigonocephaly                                         | 754442 | Knee - Congenital dislocation, Right                 |
| 754080 | Skull - Other specified deformity                      | 754443 | Knee - Congenital dislocation, Unilateral NOS        |
| 754090 | Skull - Deformity, NOS                                 | 754444 | Knee - Congenital dislocation, Bilateral             |
| 754100 | Sternocleidomastoid muscle - Anomalies, laterality unk | 754490 | Leg - Deformity, NOS, Laterality Unk                 |
| 754101 | Sternocleidomastoid muscle - Anomalies, left           | 754491 | Leg - Deformity, NOS, Left                           |
| 754102 | Sternocleidomastoid muscle - Anomalies, right          | 754492 | Leg - Deformity, NOS, Right                          |
| 754103 | Sternocleidomastoid muscle - Anomalies, unilateral NOS | 754493 | Leg - Deformity, NOS, Unilateral NOS                 |
| 754104 | Sternocleidomastoid muscle - Anomalies, bilateral      | 754494 | Leg - Deformity, NOS, Bilateral                      |
| 754200 | Scoliosis - Congenital postural                        | 754500 | Talipes equinovarus, Laterality Unk                  |
| 754210 | Lordosis - Congenital postural                         | 754501 | Talipes equinovarus, Left                            |
| 754220 | Curvature of spine - Congenital postural, NOS          | 754502 | Talipes equinovarus, Right                           |
| 754300 | Hip - Congenital dislocation, laterality unk           | 754503 | Talipes equinovarus, Unilateral NOS                  |
| 754301 | Hip - Congenital dislocation, left                     | 754504 | Talipes equinovarus, Bilateral                       |
| 754302 | Hip - Congenital dislocation, right                    | 754510 | Talipes calcaneovarus, Laterality Unk                |
| 754303 | Hip - Congenital dislocation, unilateral NOS           | 754511 | Talipes calcaneovarus, Left                          |
| 754304 | Hip - Congenital dislocation, bilateral                | 754512 | Talipes calcaneovarus, Right                         |
| 754310 | Hip - Unstable hip , Laterality Unk                    | 754513 | Talipes calcaneovarus, Unilateral NOS                |
| 754311 | Hip - Unstable hip, Left                               | 754514 | Talipes calcaneovarus, Bilateral                     |
| 754312 | Hip - Unstable hip, Right                              | 754530 | Feet - Varus deformities, complex, Laterality Unk    |
| 754313 | Hip - Unstable hip, Unilateral NOS                     | 754531 | Feet - Varus deformities, complex, Left              |
| 754314 | Hip - Unstable hip, Bilateral                          | 754532 | Feet - Varus deformities, complex, Right             |
| 754400 | Femur - Bowed, Laterality Unk                          | 754533 | Feet - Varus deformities, complex, Unilateral NOS    |
| 754401 | Femur - Bowed, Left                                    | 754534 | Feet - Varus deformities, complex, Bilateral         |
| 754402 | Femur - Bowed, Right                                   | 754590 | Feet - Unspecified varus deformities, Laterality Unk |
|        |                                                        | 754591 | Feet - Unspecified varus deformities, Left           |
|        |                                                        | 754592 | Feet - Unspecified varus deformities, Right          |
|        |                                                        | 754593 | Feet - Unspecified varus deformities, Unilateral NOS |
|        |                                                        | 754594 | Feet - Unspecified varus deformities, Bilateral      |

**SUPPLEMENTAL MATERIAL**

Table S2: CDC/BPA Codes to Identify Non-Cardiac Congenital Anomalies

|        |                                                                 |        |                                                                             |
|--------|-----------------------------------------------------------------|--------|-----------------------------------------------------------------------------|
| 754600 | Talipes calcaneovalgus, Laterality Unk                          | 754783 | Ankle and/or toes - Other specified deformities, Unilateral NOS             |
| 754601 | Talipes calcaneovalgus, Left                                    | 754784 | Ankle and/or toes - Other specified deformities, Bilateral                  |
| 754602 | Talipes calcaneovalgus, Right                                   | 754800 | Pectus carinatum                                                            |
| 754603 | Talipes calcaneovalgus, Unilateral NOS                          | 754810 | Pectus excavatum                                                            |
| 754604 | Talipes calcaneovalgus, Bilateral                               | 754820 | Chest - Other anomalies                                                     |
| 754610 | Congenital pes planus, Laterality Unk                           | 754825 | Chest - Shield                                                              |
| 754611 | Congenital pes planus, Left                                     | 754830 | Elbow - Congenital dislocation, Laterality Unk                              |
| 754612 | Congenital pes planus, Right                                    | 754831 | Elbow - Congenital dislocation, Left                                        |
| 754613 | Congenital pes planus, Unilateral NOS                           | 754832 | Elbow - Congenital dislocation, Right                                       |
| 754614 | Congenital pes planus, Bilateral                                | 754833 | Elbow - Congenital dislocation, Unilateral NOS                              |
| 754615 | Pes valgus                                                      | 754834 | Elbow - Congenital dislocation, Bilateral                                   |
| 754680 | Feet - Other specified valgus deformities, Laterality Unk       | 754840 | Hand or fingers - Clubbed, congenital, Laterality Unk                       |
| 754681 | Feet - Other specified valgus deformities, Left                 | 754841 | Hand or fingers - Clubbed, congenital, Left                                 |
| 754682 | Feet - Other specified valgus deformities, Right                | 754842 | Hand or fingers - Clubbed, congenital, Right                                |
| 754683 | Feet - Other specified valgus deformities, Unilateral NOS       | 754843 | Hand or fingers - Clubbed, congenital, Unilateral NOS                       |
| 754684 | Feet - Other specified valgus deformities, Bilateral            | 754844 | Hand or fingers - Clubbed, congenital, Bilateral                            |
| 754690 | Feet - Unspecified valgus deformities, Laterality Unk           | 754850 | Hand - Spade-like, Laterality Unk                                           |
| 754691 | Feet - Unspecified valgus deformities, Left                     | 754851 | Hand - Spade-like, Left                                                     |
| 754692 | Feet - Unspecified valgus deformities, Right                    | 754852 | Hand - Spade-like, Right                                                    |
| 754693 | Feet - Unspecified valgus deformities, Unilateral NOS           | 754853 | Hand - Spade-like, Unilateral NOS                                           |
| 754694 | Feet - Unspecified valgus deformities, Bilateral                | 754854 | Hand - Spade-like, Bilateral                                                |
| 754700 | Pes cavus, Laterality Unk                                       | 754880 | Hands - Other specified deformity of hands, Laterality Unk                  |
| 754701 | Pes cavus, Left                                                 | 754881 | Hands - Other specified deformity of hands, Left                            |
| 754702 | Pes cavus, Right                                                | 754882 | Hands - Other specified deformity of hands, Right                           |
| 754703 | Pes cavus, Unilateral NOS                                       | 754883 | Hands - Other specified deformity of hands, Unilateral NOS                  |
| 754704 | Pes cavus, Bilateral                                            | 754884 | Hands - Other specified deformity of hands, Bilateral                       |
| 754720 | Achilles tendon - Short, Laterality Unk                         | 755005 | Polydactyly, fingers - Postaxial, Type A                                    |
| 754721 | Achilles tendon - Short, Left                                   | 755006 | Polydactyly, fingers or toes - Postaxial, Type B                            |
| 754722 | Achilles tendon - Short, Right                                  | 755007 | Polydactyly, fingers - Postaxial, type (finger vs. skin tag) not specified. |
| 754723 | Achilles tendon - Short, Unilateral NOS                         | 755010 | Polydactyly, fingers - Preaxial, Laterality Unk                             |
| 754724 | Achilles tendon - Short, Bilateral                              | 755011 | Polydactyly, fingers - Preaxial, Left                                       |
| 754730 | Clubfoot, NOS, Laterality Unk                                   | 755012 | Polydactyly, fingers - Preaxial, Right                                      |
| 754731 | Clubfoot, NOS, Left                                             | 755013 | Polydactyly, fingers - Preaxial, Unilateral NOS                             |
| 754732 | Clubfoot, NOS, Right                                            | 755014 | Polydactyly, fingers - Preaxial, Bilateral                                  |
| 754733 | Clubfoot, NOS, Unilateral NOS                                   | 755020 | Polydactyly, toes - Postaxial, Laterality Unk                               |
| 754734 | Clubfoot, NOS, Bilateral                                        | 755021 | Polydactyly, toes - Postaxial, Left                                         |
| 754735 | Foot - Congenital deformities, NOS                              | 755022 | Polydactyly, toes - Postaxial, Right                                        |
| 754780 | Ankle and/or toes - Other specified deformities, Laterality Unk | 755023 | Polydactyly, toes - Postaxial, Unilateral NOS                               |
| 754781 | Ankle and/or toes - Other specified deformities, Left           | 755024 | Polydactyly, toes - Postaxial, Bilateral                                    |
| 754782 | Ankle and/or toes - Other specified deformities, Right          | 755030 | Polydactyly, toes - Preaxial, Laterality Unk                                |
|        |                                                                 | 755031 | Polydactyly, toes - Preaxial, Left                                          |
|        |                                                                 | 755032 | Polydactyly, toes - Preaxial, Right                                         |

**SUPPLEMENTAL MATERIAL**

Table S2: CDC/BPA Codes to Identify Non-Cardiac Congenital Anomalies

|        |                                                                 |        |                                                                      |
|--------|-----------------------------------------------------------------|--------|----------------------------------------------------------------------|
| 755033 | Polydactyly, toes - Preaxial, Unilateral NOS                    | 755214 | Absent upper arm and forearm, bilateral                              |
| 755034 | Polydactyly, toes - Preaxial, Bilateral                         | 755220 | Absent upper arm only or forearm only, laterality unk                |
| 755090 | Polydactyly, hand/foot not specified, Laterality Unk            | 755221 | Absent upper arm only or forearm only, left                          |
| 755091 | Polydactyly, hand/foot not specified, Left                      | 755222 | Absent upper arm only or forearm only, right                         |
| 755092 | Polydactyly, hand/foot not specified, Right                     | 755223 | Absent upper arm only or forearm only, unilateral NOS                |
| 755093 | Polydactyly, hand/foot not specified, Unilateral NOS            | 755224 | Absent upper arm only or forearm only, bilateral                     |
| 755094 | Polydactyly, hand/foot not specified, Bilateral                 | 755230 | Absent forearm and hand, laterality unk                              |
| 755095 | Polydactyly, fingers - Preaxial/postaxial not specified         | 755231 | Absent forearm and hand, left                                        |
| 755096 | Polydactyly, toes - Preaxial/postaxial not specified            | 755232 | Absent forearm and hand, right                                       |
| 755100 | Syndactyly, fingers - Fused, Laterality Unk                     | 755233 | Absent forearm and hand, unilateral NOS                              |
| 755101 | Syndactyly, fingers - Fused, Left                               | 755234 | Absent forearm and hand, bilateral                                   |
| 755102 | Syndactyly, fingers - Fused, Right                              | 755240 | Absent hand or fingers, laterality unk                               |
| 755103 | Syndactyly, fingers - Fused, Unilateral NOS                     | 755241 | Absent hand or fingers, left                                         |
| 755104 | Syndactyly, fingers - Fused, Bilateral                          | 755242 | Absent hand or fingers, right                                        |
| 755110 | Syndactyly, fingers - Webbed, Laterality Unk                    | 755243 | Absent hand or fingers, unilateral NOS                               |
| 755111 | Syndactyly, fingers - Webbed, Left                              | 755244 | Absent hand or fingers, bilateral                                    |
| 755112 | Syndactyly, fingers - Webbed, Right                             | 755250 | Split-hand malformation, laterality unk                              |
| 755113 | Syndactyly, fingers - Webbed, Unilateral NOS                    | 755251 | Split-hand malformation, left                                        |
| 755114 | Syndactyly, fingers - Webbed, Bilateral                         | 755252 | Split-hand malformation, right                                       |
| 755120 | Syndactyly, toes - Fused, Laterality Unk                        | 755253 | Split-hand malformation, unilateral NOS                              |
| 755121 | Syndactyly, toes - Fused, Left                                  | 755254 | Split-hand malformation, bilateral                                   |
| 755122 | Syndactyly, toes - Fused, Right                                 | 755260 | Preaxial longitudinal reduction defect - Upper limb, laterality unk  |
| 755123 | Syndactyly, toes - Fused, Unilateral NOS                        | 755261 | Preaxial longitudinal reduction defect - Upper limb, left            |
| 755124 | Syndactyly, toes - Fused, Bilateral                             | 755262 | Preaxial longitudinal reduction defect - Upper limb, right           |
| 755130 | Syndactyly, toes - Webbed, Laterality Unk                       | 755263 | Preaxial longitudinal reduction defect - Upper limb, unilateral NOS  |
| 755131 | Syndactyly, toes - Webbed, Left                                 | 755264 | Preaxial longitudinal reduction defect - Upper limb, bilateral       |
| 755132 | Syndactyly, toes - Webbed, Right                                | 755265 | Longitudinal reduction defect, type not specified - Upper limb       |
| 755133 | Syndactyly, toes - Webbed, Unilateral NOS                       | 755270 | Postaxial longitudinal reduction defect - Upper limb, laterality unk |
| 755134 | Syndactyly, toes - Webbed, Bilateral                            | 755271 | Postaxial longitudinal reduction defect - Upper limb, left           |
| 755190 | Syndactyly - Unspecified                                        | 755272 | Postaxial longitudinal reduction defect - Upper limb, right          |
| 755193 | Syndactyly, thumb and/or fingers - Webbed vs. fused unspecified | 755273 | Postaxial longitudinal reduction defect - Upper limb, unilateral NOS |
| 755196 | Syndactyly, toes - Webbed vs. fused unspecified                 | 755274 | Postaxial longitudinal reduction defect - Upper limb, bilateral      |
| 755200 | Absent upper limb, laterality unk                               | 755280 | Other specified reduction defect - Upper limb, laterality unk        |
| 755201 | Absent upper limb, left                                         | 755281 | Other specified reduction defect - Upper limb, left                  |
| 755202 | Absent upper limb, right                                        | 755282 | Other specified reduction defect - Upper limb, right                 |
| 755203 | Absent upper limb, unilateral NOS                               |        |                                                                      |
| 755204 | Absent upper limb, bilateral                                    |        |                                                                      |
| 755210 | Absent upper arm and forearm, laterality unk                    |        |                                                                      |
| 755211 | Absent upper arm and forearm, left                              |        |                                                                      |
| 755212 | Absent upper arm and forearm, right                             |        |                                                                      |
| 755213 | Absent upper arm and forearm, unilateral NOS                    |        |                                                                      |

**SUPPLEMENTAL MATERIAL**

Table S2: CDC/BPA Codes to Identify Non-Cardiac Congenital Anomalies

|        |                                                                 |        |                                                                 |
|--------|-----------------------------------------------------------------|--------|-----------------------------------------------------------------|
| 755283 | Other specified reduction defect - Upper limb, unilateral NOS   | 755361 | Longitudinal reduction defect, NOS - Lower limb, left           |
| 755284 | Other specified reduction defect - Upper limb, bilateral        | 755362 | Longitudinal reduction defect, NOS - Lower limb, right          |
| 755285 | Transverse reduction defect - Upper limb, NOS                   | 755363 | Longitudinal reduction defect, NOS - Lower limb, unilateral NOS |
| 755290 | Unspecified reduction defect - Upper limb, laterality unk       | 755364 | Longitudinal reduction defect, NOS - Lower limb, bilateral      |
| 755291 | Unspecified reduction defect - Upper limb, left                 | 755365 | Preaxial longitudinal reduction defect - Lower limb             |
| 755292 | Unspecified reduction defect - Upper limb, right                | 755366 | Postaxial longitudinal reduction defect - Lower limb            |
| 755293 | Unspecified reduction defect - Upper limb, unilateral NOS       | 755380 | Other specified reduction defect - Lower limb, laterality unk   |
| 755294 | Unspecified reduction defect - Upper limb, bilateral            | 755381 | Other specified reduction defect - Lower limb, left             |
| 755300 | Absent lower limb, laterality unk                               | 755382 | Other specified reduction defect - Lower limb, right            |
| 755301 | Absent lower limb, left                                         | 755383 | Other specified reduction defect - Lower limb, unilateral NOS   |
| 755302 | Absent lower limb, right                                        | 755384 | Other specified reduction defect - Lower limb, bilateral        |
| 755303 | Absent lower limb, unilateral NOS                               | 755385 | Transverse reduction defect, NOS - Lower limb                   |
| 755304 | Absent lower limb, bilateral                                    | 755390 | Unspecified reduction defect - Lower limb, laterality unk       |
| 755310 | Absent thigh and lower leg, laterality unk                      | 755391 | Unspecified reduction defect - Lower limb, left                 |
| 755311 | Absent thigh and lower leg, left                                | 755392 | Unspecified reduction defect - Lower limb, right                |
| 755312 | Absent thigh and lower leg, right                               | 755393 | Unspecified reduction defect - Lower limb, unilateral NOS       |
| 755313 | Absent thigh and lower leg, unilateral NOS                      | 755394 | Unspecified reduction defect - Lower limb, bilateral            |
| 755314 | Absent thigh and lower leg, bilateral                           | 755400 | Absent limb, NOS, Laterality Unk                                |
| 755320 | Absent femur only or lower leg only, laterality unk             | 755401 | Absent limb, NOS, Left                                          |
| 755321 | Absent femur only or lower leg only, left                       | 755402 | Absent limb, NOS, Right                                         |
| 755322 | Absent femur only or lower leg only, right                      | 755403 | Absent limb, NOS, Unilateral NOS                                |
| 755323 | Absent femur only or lower leg only, unilateral NOS             | 755404 | Absent limb, NOS, Bilateral                                     |
| 755324 | Absent femur only or lower leg only, bilateral                  | 755410 | Phocomelia, NOS, Laterality Unk                                 |
| 755330 | Absent lower leg and foot, laterality unk                       | 755411 | Phocomelia, NOS, Left                                           |
| 755331 | Absent lower leg and foot, left                                 | 755412 | Phocomelia, NOS, Right                                          |
| 755332 | Absent lower leg and foot, right                                | 755413 | Phocomelia, NOS, Unilateral NOS                                 |
| 755333 | Absent lower leg and foot, unilateral NOS                       | 755414 | Phocomelia, NOS, Bilateral                                      |
| 755334 | Absent lower leg and foot, bilateral                            | 755420 | Transverse reduction defect, NOS, Laterality Unk                |
| 755340 | Absent foot or toes, laterality unk                             | 755421 | Transverse reduction defect, NOS, Left                          |
| 755341 | Absent foot or toes, left                                       | 755422 | Transverse reduction defect, NOS, Right                         |
| 755342 | Absent foot or toes, right                                      | 755423 | Transverse reduction defect, NOS, Unilateral NOS                |
| 755343 | Absent foot or toes, unilateral NOS                             | 755424 | Transverse reduction defect, NOS, Bilateral                     |
| 755344 | Absent foot or toes, bilateral                                  | 755430 | Longitudinal reduction defect, NOS, Laterality Unk              |
| 755350 | Split-foot malformation, laterality unk                         | 755620 | Anomalies of ankle, Laterality Unk                              |
| 755351 | Split-foot malformation, left                                   | 755621 | Anomalies of ankle, Left                                        |
| 755352 | Split-foot malformation, right                                  |        |                                                                 |
| 755353 | Split-foot malformation, unilateral NOS                         |        |                                                                 |
| 755354 | Split-foot malformation, bilateral                              |        |                                                                 |
| 755360 | Longitudinal reduction defect, NOS - Lower limb, laterality unk |        |                                                                 |

## SUPPLEMENTAL MATERIAL

Table S2: CDC/BPA Codes to Identify Non-Cardiac Congenital Anomalies

|        |                                                         |        |                                               |
|--------|---------------------------------------------------------|--------|-----------------------------------------------|
| 755622 | Anomalies of ankle, Right                               | 756000 | Craniosynostosis, NOS, laterality unk         |
| 755623 | Anomalies of ankle, Unilateral NOS                      | 756001 | Craniosynostosis, NOS, left                   |
| 755624 | Anomalies of ankle, Bilateral                           | 756002 | Craniosynostosis, NOS, right                  |
| 755630 | Anomalies of lower leg, Laterality Unk                  | 756003 | Craniosynostosis, NOS, unilateral NOS         |
| 755631 | Anomalies of lower leg, Left                            | 756004 | Craniosynostosis, NOS, bilateral              |
| 755632 | Anomalies of lower leg, Right                           | 756005 | Craniosynostosis - Sagittal                   |
| 755633 | Anomalies of lower leg, Unilateral NOS                  | 756006 | Craniosynostosis - Metopic                    |
| 755634 | Anomalies of lower leg, Bilateral                       | 756010 | Craniosynostosis - Coronal, laterality unk    |
| 755640 | Anomalies of knee, Laterality Unk                       | 756011 | Craniosynostosis - Coronal, left              |
| 755641 | Anomalies of knee, Left                                 | 756012 | Craniosynostosis - Coronal, right             |
| 755642 | Anomalies of knee, Right                                | 756013 | Craniosynostosis - Coronal, unilateral NOS    |
| 755643 | Anomalies of knee, Unilateral NOS                       | 756014 | Craniosynostosis - Coronal, bilateral         |
| 755644 | Anomalies of knee, Bilateral                            | 756020 | Craniosynostosis - Lambdoidal, laterality unk |
| 755645 | Genu valgum                                             | 756021 | Craniosynostosis - Lambdoidal, left           |
| 755646 | Genu varum                                              | 756022 | Craniosynostosis - Lambdoidal, right          |
| 755647 | Absent or rudimentary patella                           | 756023 | Craniosynostosis - Lambdoidal, unilateral NOS |
| 755650 | Anomalies of upper leg, Laterality Unk                  | 756024 | Craniosynostosis - Lambdoidal, bilateral      |
| 755651 | Anomalies of upper leg, Left                            | 756030 | Craniosynostosis - Other types                |
| 755652 | Anomalies of upper leg, Right                           | 756040 | Craniofacial dysostosis                       |
| 755653 | Anomalies of upper leg, Unilateral NOS                  | 756045 | Mandibulofacial dysostosis                    |
| 755654 | Anomalies of upper leg, Bilateral                       | 756046 | Other craniofacial syndromes                  |
| 755660 | Anomalies of hip, Laterality Unk                        | 756050 | Acrocephalosyndactyly, NOS                    |
| 755661 | Anomalies of hip, Left                                  | 756055 | Acrocephalosyndactyly, types I or II          |
| 755662 | Anomalies of hip, Right                                 | 756056 | Acrocephalosyndactyly, type III               |
| 755663 | Anomalies of hip, Unilateral NOS                        | 756057 | Acrocephalosyndactyly - Other specified types |
| 755664 | Anomalies of hip, Bilateral                             | 756060 | Goldenhar syndrome                            |
| 755665 | Hip dysplasia, NOS.                                     | 756065 | Hemifacial microsomia                         |
| 755670 | Anomalies of pelvis                                     | 756080 | Other specified skull and face bone anomalies |
| 755680 | Other specified anomalies of lower limb, Laterality Unk | 756085 | Hypertelorism                                 |
| 755681 | Other specified anomalies of lower limb, Left           | 756090 | Unspecified skull and face bone anomalies.    |
| 755682 | Other specified anomalies of lower limb, Right          | 756100 | Spina bifida occulta                          |
| 755683 | Other specified anomalies of lower limb, Unilateral NOS | 756110 | Klippel-Feil syndrome                         |
| 755684 | Other specified anomalies of lower limb, Bilateral      | 756120 | Kyphosis                                      |
| 755685 | Hypoplasia of lower limb                                | 756130 | Congenital spondylolisthesis                  |
| 755690 | Unspecified anomalies of legs, Laterality Unk           | 756140 | Anomalies of cervical vertebrae               |
| 755691 | Unspecified anomalies of legs, Left                     | 756145 | Hemivertebrae of cervical vertebrae           |
| 755692 | Unspecified anomalies of legs, Right                    | 756146 | Agenesis of cervical vertebrae                |
| 755693 | Unspecified anomalies of legs, Unilateral NOS           | 756150 | Anomalies of thoracic vertebrae               |
| 755694 | Unspecified anomalies of legs, Bilateral                | 756155 | Hemivertebrae of thoracic vertebrae           |
| 755800 | Arthrogyposis multiplex congenita                       | 756156 | Agenesis of thoracic vertebrae                |
| 755810 | Larsen's syndrome                                       | 756160 | Anomalies of lumbar vertebrae                 |
| 755880 | Other specified anomalies of unspecified limb           | 756165 | Hemivertebrae of lumbar vertebrae             |
| 755900 | Unspecified anomalies of unspecified limb               | 756166 | Agenesis of lumbar vertebrae                  |
|        |                                                         | 756170 | Sacroccygeal anomalies                        |
|        |                                                         | 756175 | Sacral agenesis                               |
|        |                                                         | 756179 | Sacral mass, NOS                              |
|        |                                                         | 756180 | Other specified vertebral anomalies           |
|        |                                                         | 756185 | Hemivertebrae, NOS                            |
|        |                                                         | 756190 | Unspecified anomalies of spine                |
|        |                                                         | 756300 | Rib - Absent, laterality unk                  |
|        |                                                         | 756301 | Rib - Absent, left                            |

**SUPPLEMENTAL MATERIAL**

Table S2: CDC/BPA Codes to Identify Non-Cardiac Congenital Anomalies

|        |                                        |        |                                                        |
|--------|----------------------------------------|--------|--------------------------------------------------------|
| 756302 | Rib - Absent, right                    | 756580 | Other specified osteodystrophies                       |
| 756303 | Rib - Absent, unilateral NOS           | 756590 | Unspecified osteodystrophies                           |
| 756304 | Rib - Absent, bilateral                | 756600 | Absent diaphragm                                       |
| 756310 | Rib - Misshapen, laterality unk        | 756610 | Diaphragmatic hernia - Congenital, NOS                 |
| 756311 | Rib - Misshapen, left                  | 756615 | Diaphragmatic hernia - Bochdalek                       |
| 756312 | Rib - Misshapen, right                 | 756616 | Diaphragmatic hernia - Morgagni                        |
| 756313 | Rib - Misshapen, unilateral NOS        | 756617 | Hemidiaphragm                                          |
| 756314 | Rib - Misshapen, bilateral             | 756620 | Eventration of diaphragm, laterality unk               |
| 756320 | Rib - Fused, laterality unk            | 756621 | Eventration of diaphragm, left                         |
| 756321 | Rib - Fused, left                      | 756622 | Eventration of diaphragm, right                        |
| 756322 | Rib - Fused, right                     | 756623 | Eventration of diaphragm, unilateral NOS               |
| 756323 | Rib - Fused, unilateral NOS            | 756624 | Eventration of diaphragm, bilateral                    |
| 756324 | Rib - Fused, bilateral                 | 756680 | Other specified anomalies of diaphragm, laterality unk |
| 756330 | Rib - Extra, laterality unk            | 756681 | Other specified anomalies of diaphragm, left           |
| 756331 | Rib - Extra, left                      | 756682 | Other specified anomalies of diaphragm, right          |
| 756332 | Rib - Extra, right                     | 756683 | Other specified anomalies of diaphragm, unilateral NOS |
| 756333 | Rib - Extra, unilateral NOS            | 756684 | Other specified anomalies of diaphragm, bilateral      |
| 756334 | Rib - Extra, bilateral                 | 756690 | Unspecified anomalies of diaphragm, laterality unk     |
| 756340 | Rib - Other anomalies, laterality unk  | 756691 | Unspecified anomalies of diaphragm, left               |
| 756341 | Rib - Other anomalies, left            | 756692 | Unspecified anomalies of diaphragm, right              |
| 756342 | Rib - Other anomalies, right           | 756693 | Unspecified anomalies of diaphragm, unilateral NOS     |
| 756343 | Rib - Other anomalies, unilateral NOS  | 756694 | Unspecified anomalies of diaphragm, bilateral          |
| 756344 | Rib - Other anomalies, bilateral       | 756700 | Omphalocele                                            |
| 756350 | Absence of sternum                     | 756710 | Gastroschisis                                          |
| 756360 | Misshapen sternum                      | 756720 | Prune belly syndrome                                   |
| 756380 | Other anomalies of sternum             | 756790 | Other and unspecified anomalies of abdominal wall      |
| 756390 | Unspecified anomalies of thoracic cage | 756795 | Epigastric hernia                                      |
| 756400 | Asphyxiating thoracic dystrophy        | 756800 | Poland syndrome or anomaly, laterality unk             |
| 756410 | Chondrodysplasia                       | 756801 | Poland syndrome or anomaly, left                       |
| 756420 | Chondrodysplasia with hemangioma       | 756802 | Poland syndrome or anomaly, right                      |
| 756430 | Dwarfism - Achondroplastic             | 756803 | Poland syndrome or anomaly, unilateral NOS             |
| 756445 | Dwarfism - Diastrophic                 | 756804 | Poland syndrome or anomaly, bilateral                  |
| 756446 | Dwarfism - Metatrophic                 | 756810 | Other absent or hypoplastic muscle, laterality unk     |
| 756447 | Dwarfism - Thanatophoric               | 756811 | Other absent or hypoplastic muscle, left               |
| 756450 | Metaphyseal dysostosis                 | 756812 | Other absent or hypoplastic muscle, right              |
| 756460 | Spondyloepiphyseal dysplasia           | 756813 | Other absent or hypoplastic muscle, unilateral NOS     |
| 756470 | Exostosis                              | 756814 | Other absent or hypoplastic muscle, bilateral          |
| 756480 | Other specified chondrodystrophy       | 756820 | Absent tendon, laterality unk                          |
| 756490 | Unspecified chondrodystrophy           | 756821 | Absent tendon, left                                    |
| 756500 | Osteogenesis imperfecta                | 756822 | Absent tendon, right                                   |
| 756505 | Osteosarthyrosis                       | 756823 | Absent tendon, unilateral NOS                          |
| 756506 | Fragilitas ossium                      | 756824 | Absent tendon, bilateral                               |
| 756510 | Polyostotic fibrous dysplasia          | 756830 | Nail-patella syndrome                                  |
| 756520 | Chondroectodermal dysplasia            |        |                                                        |
| 756525 | Ellis-van Creveld syndrome             |        |                                                        |
| 756530 | Infantile cortical hyperostosis        |        |                                                        |
| 756540 | Osteopetrosis                          |        |                                                        |
| 756550 | Progressive diaphyseal dysplasia       |        |                                                        |
| 756560 | Osteopoikilosis                        |        |                                                        |
| 756570 | Multiple epiphyseal dysplasia          |        |                                                        |
| 756575 | Conradi syndrome                       |        |                                                        |

**SUPPLEMENTAL MATERIAL**

Table S2: CDC/BPA Codes to Identify Non-Cardiac Congenital Anomalies

|        |                                                                           |        |                                                               |
|--------|---------------------------------------------------------------------------|--------|---------------------------------------------------------------|
| 756840 | Amyotrophia congenita                                                     | 757502 | Anonychia, congenital, right                                  |
| 756850 | Ehlers-Danlos syndrome                                                    | 757503 | Anonychia, congenital, unilateral NOS                         |
| 756860 | Congenital torticollis, laterality unk                                    | 757504 | Anonychia, congenital, bilateral                              |
| 756861 | Congenital torticollis, left                                              | 757510 | Nails - Enlarged or hypertrophic, laterality unk              |
| 756862 | Congenital torticollis, right                                             | 757511 | Nails - Enlarged or hypertrophic, left                        |
| 756863 | Congenital torticollis, unilateral NOS                                    | 757512 | Nails - Enlarged or hypertrophic, right                       |
| 756864 | Congenital torticollis, bilateral                                         | 757513 | Nails - Enlarged or hypertrophic, unilateral NOS              |
| 756880 | Other specified anomalies of muscle, tendon, fascia and connective tissue | 757514 | Nails - Enlarged or hypertrophic, bilateral                   |
| 756900 | Unspecified anomalies of muscle                                           | 757515 | Onychauxis                                                    |
| 756910 | Unspecified anomalies of tendon                                           | 757516 | Pachyonychia                                                  |
| 756920 | Unspecified anomalies of bone                                             | 757520 | Koilonychia, congenital                                       |
| 756930 | Unspecified anomalies of cartilage                                        | 757530 | Leukonychia, congenital                                       |
| 756940 | Unspecified anomalies of connective tissue                                | 757540 | Club nail, laterality unk                                     |
| 756990 | Unspecified anomalies of musculoskeletal system                           | 757541 | Club nail, left                                               |
| 757000 | Hereditary edema of legs, laterality unk                                  | 757542 | Club nail, right                                              |
| 757001 | Hereditary edema of legs, left                                            | 757543 | Club nail, unilateral NOS                                     |
| 757002 | Hereditary edema of legs, right                                           | 757544 | Club nail, bilateral                                          |
| 757003 | Hereditary edema of legs, unilateral NOS                                  | 757580 | Nails - Other specified anomalies                             |
| 757004 | Hereditary edema of legs, bilateral                                       | 757585 | Nails - Hypoplastic                                           |
| 757100 | Ichthyosis, congenital - Harlequin fetus                                  | 757600 | Breast - Absent, with absent nipple, laterality unk           |
| 757110 | Ichthyosis, congenital - Collodion baby                                   | 757601 | Breast - Absent, with absent nipple, left                     |
| 757115 | Ichthyosis, congenital - Bullous type                                     | 757602 | Breast - Absent, with absent nipple, right                    |
| 757120 | Ichthyosis, congenital - Sjogren-Larsson syndrome                         | 757603 | Breast - Absent, with absent nipple, unilateral NOS           |
| 757190 | Ichthyosis, congenital - Other and unspecified                            | 757604 | Breast - Absent, with absent nipple, bilateral                |
| 757195 | Ichthyosis, congenital - Ichthyosis vulgaris                              | 757610 | Breast - Hypoplastic, with hypoplastic nipple, laterality unk |
| 757196 | Ichthyosis, congenital - X-linked ichthyosis                              | 757611 | Breast - Hypoplastic, with hypoplastic nipple, left           |
| 757197 | Ichthyosis, congenital - Ichthyosiform erythroderma                       | 757612 | Breast - Hypoplastic, with hypoplastic nipple, right          |
| 757300 | Specified syndromes involving skin, not elsewhere classified              | 757613 | Breast - Hypoplastic, with hypoplastic nipple, unilateral NOS |
| 757320 | Urticaria pigmentosa                                                      | 757614 | Breast - Hypoplastic, with hypoplastic nipple, bilateral      |
| 757330 | Epidermolysis bullosa                                                     | 757620 | Breast - Accessory, with nipple, laterality unk               |
| 757340 | Ectodermal dysplasia, NOS                                                 | 757621 | Breast - Accessory, with nipple, left                         |
| 757345 | Ectodermal dysplasia, X-linked type                                       | 757622 | Breast - Accessory, with nipple, right                        |
| 757346 | Ectodermal dysplasia, Other specified                                     | 757623 | Breast - Accessory, with nipple, unilateral NOS               |
| 757350 | Incontinentia pigmenti                                                    | 757624 | Breast - Accessory, with nipple, bilateral                    |
| 757360 | Xeroderma pigmentosum                                                     | 757630 | Nipple - Absent, laterality unk                               |
| 757370 | Cutis laxa hyperelastica                                                  | 757631 | Nipple - Absent, left                                         |
| 757390 | Skin - Other specified anomalies                                          | 757632 | Nipple - Absent, right                                        |
| 757395 | Skin - Absence                                                            | 757633 | Nipple - Absent, unilateral NOS                               |
| 757400 | Alopecia, congenital                                                      | 757634 | Nipple - Absent, bilateral                                    |
| 757410 | Hair - Beaded                                                             | 757640 | Nipple - Small or hypoplastic, laterality unk                 |
| 757420 | Hair - Twisted                                                            | 757641 | Nipple - Small or hypoplastic, left                           |
| 757430 | Hair - Taenzer's                                                          | 757642 | Nipple - Small or hypoplastic, right                          |
| 757480 | Hair - Other specified anomalies                                          | 757643 | Nipple - Small or hypoplastic, unilateral NOS                 |
| 757500 | Anonychia, congenital, laterality unk                                     | 757644 | Nipple - Small or hypoplastic, bilateral                      |
| 757501 | Anonychia, congenital, left                                               | 757680 | Breast - Other specified anomalies, laterality unk            |

**SUPPLEMENTAL MATERIAL**

Table S2: CDC/BPA Codes to Identify Non-Cardiac Congenital Anomalies

|        |                                                                                                                                    |        |                                                       |
|--------|------------------------------------------------------------------------------------------------------------------------------------|--------|-------------------------------------------------------|
| 757681 | Breast - Other specified anomalies, left                                                                                           | 758400 | Balanced autosomal translocation in normal individual |
| 757682 | Breast - Other specified anomalies, right                                                                                          | 758500 | Trisomy 8                                             |
| 757683 | Breast - Other specified anomalies, unilateral NOS                                                                                 | 758510 | Trisomy C - Other                                     |
| 757684 | Breast - Other specified anomalies, bilateral                                                                                      | 758520 | Trisomy - Other total                                 |
| 757800 | Skin - Other specified anomalies                                                                                                   | 758530 | Trisomy - Partial                                     |
| 757900 | Skin - Unspecified anomalies                                                                                                       | 758540 | Translocation - Other                                 |
| 757910 | Hair - Unspecified anomalies                                                                                                       | 758580 | Autosomes - Other specified anomalies, NOS            |
| 757920 | Nail - Unspecified anomalies                                                                                                       | 758585 | Polyploidy                                            |
| 757990 | Integument - Unspecified anomalies                                                                                                 | 758586 | Triploidy                                             |
| 758000 | Trisomy 21 - karyotype documented                                                                                                  | 758590 | Autosomes - Unspecified anomalies                     |
| 758010 | Trisomy G, NOS - karyotype documented                                                                                              | 758600 | Turner phenotype - Karyotype 45,X or 45,XO            |
| 758020 | Translocation trisomy 21                                                                                                           | 758610 | Turner phenotype - Variant karyotypes.                |
| 758030 | Translocation trisomy G, NOS                                                                                                       | 758690 | Turner syndrome - Unspecified karyotype               |
| 758040 | Mosaic trisomy 21 syndrome                                                                                                         | 758790 | Klinefelter syndrome, NOS                             |
| 758090 | Trisomy 21, NOS                                                                                                                    | 758800 | Sex chromosome - Mosaic XO/XY                         |
| 758100 | Trisomy 13 - karyotype documented                                                                                                  | 758810 | Sex chromosome - Mosaic XO/XX                         |
| 758110 | Trisomy D, NOS                                                                                                                     | 758820 | Sex chromosome - Mosaic XY/XXY                        |
| 758120 | Translocation trisomy 13                                                                                                           | 758830 | Sex chromosome - Mosaic that includes XXXXY           |
| 758130 | Translocation trisomy D, NOS                                                                                                       | 758840 | Sex chromosome - XYY in a male                        |
| 758190 | Trisomy 13, NOS                                                                                                                    | 758850 | Sex chromosome - XXX in a female                      |
| 758200 | Trisomy 18 - karyotype documented                                                                                                  | 758860 | Sex chromosome - Additional, NOS                      |
| 758210 | Trisomy E, NOS                                                                                                                     | 758880 | Sex chromosome - Other specified anomaly              |
| 758220 | Translocation trisomy 18                                                                                                           | 758890 | Sex chromosome - Unspecified anomaly                  |
| 758230 | Translocation trisomy E, NOS                                                                                                       | 758900 | Chromosome - Mosaicism, NOS                           |
| 758290 | Trisomy 18, NOS                                                                                                                    | 758910 | Chromosome - Additional, NOS                          |
| 758295 | Edwards phenotype with normal karyotype                                                                                            | 758920 | Chromosome - Deletion, NOS                            |
| 758300 | Antimongolism syndrome/clinical antimongolism syndrome with karyotype partial or total deletion of 21 or a G-group chromosome, NOS | 758930 | Chromosome - Duplication, NOS                         |
| 758310 | Cri du chat syndrome / clinical Cri du chat syndrome with karyotype deletion of 5 or a B-group chromosome, NOS                     | 758990 | Chromosome - Unspecified anomaly                      |
| 758320 | Wolff-Hirschorn syndrome / clinical Wolff-Hirschorn syndrome with karyotype deletion of 4 or a B-group chromosome, NOS             | 759000 | Spleen - Absence                                      |
| 758330 | Deletion of long arm of 13 / deletion of long arm of a D-group, NOS                                                                | 759005 | Ivemark syndrome                                      |
| 758340 | Deletion of long arm of E / deletion long arm of 17 or 18                                                                          | 759010 | Spleen - Hypoplasia                                   |
| 758350 | Deletion of short arm of E/deletion short arm of 17 or 18                                                                          | 759030 | Spleen - Misshapen                                    |
| 758360 | Monosomy G mosaicism                                                                                                               | 759040 | Spleen - Accessory, laterality unk                    |
| 758370 | Deletion in band 11 of long arm of chromosome 22                                                                                   | 759041 | Spleen - Accessory, left                              |
| 758380 | Other loss of autosomal material / microdeletion                                                                                   | 759042 | Spleen - Accessory, right                             |
| 758390 | Unspecified autosomal deletion syndromes                                                                                           | 759043 | Spleen - Accessory, unilateral NOS                    |
|        |                                                                                                                                    | 759044 | Spleen - Accessory, bilateral                         |
|        |                                                                                                                                    | 759050 | Spleen - Ectopic, laterality unk                      |
|        |                                                                                                                                    | 759051 | Spleen - Ectopic, left                                |
|        |                                                                                                                                    | 759052 | Spleen - Ectopic, right                               |
|        |                                                                                                                                    | 759053 | Spleen - Ectopic, unilateral NOS                      |
|        |                                                                                                                                    | 759054 | Spleen - Ectopic, bilateral                           |
|        |                                                                                                                                    | 759080 | Spleen - Other specified anomalies                    |
|        |                                                                                                                                    | 759090 | Spleen - Unspecified anomalies                        |
|        |                                                                                                                                    | 759100 | Adrenal gland - Absence, laterality unk               |
|        |                                                                                                                                    | 759101 | Adrenal gland - Absence, left                         |
|        |                                                                                                                                    | 759102 | Adrenal gland - Absence, right                        |
|        |                                                                                                                                    | 759103 | Adrenal gland - Absence, unilateral NOS               |
|        |                                                                                                                                    | 759104 | Adrenal gland - Absence, bilateral                    |
|        |                                                                                                                                    | 759110 | Adrenal gland - Hypoplasia, laterality unk            |



**SUPPLEMENTAL MATERIAL**

Table S2: CDC/BPA Codes to Identify Non-Cardiac Congenital Anomalies

|        |                                                         |        |                                                                 |
|--------|---------------------------------------------------------|--------|-----------------------------------------------------------------|
| 759111 | Adrenal gland - Hypoplasia, left                        | 759390 | Situs inversus - Unspecified                                    |
| 759112 | Adrenal gland - Hypoplasia, right                       | 759400 | Conjoined twins - Dicephalus (two heads)                        |
| 759113 | Adrenal gland - Hypoplasia, unilateral NOS              | 759410 | Conjoined twins - Craniopagus (head-joined)                     |
| 759114 | Adrenal gland - Hypoplasia, bilateral                   | 759420 | Conjoined twins - Thoracopagus (thorax-joined)                  |
| 759120 | Adrenal gland - Accessory, laterality unk               | 759430 | Conjoined twins - Xiphopagus (xiphoid- and pelvis-joined)       |
| 759121 | Adrenal gland - Accessory, left                         | 759440 | Conjoined twins - Pygopagus (buttock-joined)                    |
| 759122 | Adrenal gland - Accessory, right                        | 759480 | Conjoined twins - Other specified                               |
| 759123 | Adrenal gland - Accessory, unilateral NOS               | 759490 | Conjoined twins - Unspecified                                   |
| 759124 | Adrenal gland - Accessory, bilateral                    | 759500 | Tuberous sclerosis                                              |
| 759130 | Adrenal gland - Ectopic, laterality unk                 | 759600 | Peutz-Jeghers syndrome                                          |
| 759131 | Adrenal gland - Ectopic, left                           | 759610 | Angiomatosis - Encephalocutaneous                               |
| 759132 | Adrenal gland - Ectopic, right                          | 759620 | Von Hippel-Lindau syndrome                                      |
| 759133 | Adrenal gland - Ectopic, unilateral NOS                 | 759630 | Gardner syndrome                                                |
| 759134 | Adrenal gland - Ectopic, bilateral                      | 759680 | Hamartoma - Other specified hamartoma                           |
| 759180 | Adrenal gland - Other specified anomaly, laterality unk | 759690 | Hamartoma - Unspecified                                         |
| 759181 | Adrenal gland - Other specified anomaly, left           | 759700 | Multiple congenital anomalies, NOS                              |
| 759182 | Adrenal gland - Other specified anomaly, right          | 759800 | Congenital malformation syndromes affecting facial appearance   |
| 759183 | Adrenal gland - Other specified anomaly, unilateral NOS | 759820 | Congenital malformation syndromes associated with short stature |
| 759184 | Adrenal gland - Other specified anomaly, bilateral      | 759840 | Congenital malformation syndromes involving limbs               |
| 759190 | Adrenal gland - Unspecified anomaly, laterality unk     | 759860 | Congenital malformation syndromes with other skeletal changes   |
| 759191 | Adrenal gland - Unspecified anomaly, left               | 759870 | Congenital malformation syndromes with metabolic disturbances   |
| 759192 | Adrenal gland - Unspecified anomaly, right              | 759890 | Other specified anomalies                                       |
| 759193 | Adrenal gland - Unspecified anomaly, unilateral NOS     | 759900 | Umbilical anomalies                                             |
| 759194 | Adrenal gland - Unspecified anomaly, bilateral          | 759910 | Embryopathy, NOS                                                |
| 759200 | Pituitary gland anomalies                               | 759990 | Congenital anomaly, NOS                                         |
| 759210 | Thyroid gland anomalies                                 | 760710 | Fetal alcohol syndrome (FAS)                                    |
| 759220 | Thyroglossal duct anomalies                             | 760750 | Fetal hydantoin (Dilantin) syndrome                             |
| 759230 | Parathyroid gland anomalies, laterality unk             | 771000 | Infection, congenital - rubella                                 |
| 759231 | Parathyroid gland anomalies, left                       | 771090 | Infection, congenital - TORCH unspecified                       |
| 759232 | Parathyroid gland anomalies, right                      | 771100 | Infection, congenital - cytomegalovirus (CMV)                   |
| 759233 | Parathyroid gland anomalies, unilateral NOS             | 771210 | Infection, congenital - toxoplasmosis                           |
| 759234 | Parathyroid gland anomalies, bilateral                  | 771220 | Infection, congenital - herpes simplex                          |
| 759240 | Thymus anomalies                                        | 771230 | Infection, congenital - Zika virus                              |
| 759280 | Endocrine gland, other - Specified anomalies            | 771280 | Infection, congenital - other specified                         |
| 759290 | Endocrine gland, other - Unspecified anomalies          | 774480 | Hepatitis, neonatal - specified                                 |
| 759300 | Dextrocardia with complete situs inversus               | 774490 | Hepatitis, neonatal - NOS                                       |
| 759310 | Situs inversus with levocardia                          | 999999 | Other, unspecified diagnostic code                              |
| 759320 | Situs inversus thoracis                                 |        | NOS: Not otherwise specified; Unk: Unknown                      |
| 759330 | Situs inversus abdominis                                |        |                                                                 |
| 759340 | Kartagener syndrome                                     |        |                                                                 |

**SUPPLEMENTAL MATERIAL**

Table S3: Global Physical Health and Global Mental Health Items

Items contributing to global **physical** health:

|                                                                                                                                                     |                                                          |           |            |          |             |   |   |   |   |   |
|-----------------------------------------------------------------------------------------------------------------------------------------------------|----------------------------------------------------------|-----------|------------|----------|-------------|---|---|---|---|---|
| In general, how would you rate your physical health?                                                                                                | Excellent                                                | Very Good | Good       | Fair     | Poor        |   |   |   |   |   |
| To what extent are you able to carry out your everyday physical activities such as walking, climbing stairs, carrying groceries, or moving a chair? | Completely                                               | Mostly    | Moderately | A little | Not at all  |   |   |   |   |   |
| <u>In the past 7 days</u> , how would you rate your pain on average?                                                                                | 0<br>10<br>No<br>Worst<br>Pain<br>Pain<br><br>Imaginable | 1         | 2          | 3        | 4           | 5 | 6 | 7 | 8 | 9 |
| <u>In the past 7 days</u> , how would you rate your fatigue on average?                                                                             | None                                                     | Mild      | Moderate   | Severe   | Very Severe |   |   |   |   |   |

Items contributing to global **mental** health:

|                                                                                                                                     |           |           |           |       |        |
|-------------------------------------------------------------------------------------------------------------------------------------|-----------|-----------|-----------|-------|--------|
| In general, would you say your quality of life is:                                                                                  | Excellent | Very Good | Good      | Fair  | Poor   |
| In general, how would you rate your mental health, including your mood and your ability to think?                                   | Excellent | Very Good | Good      | Fair  | Poor   |
| In general, how would you rate your satisfaction with your social activities and relationships?                                     | Excellent | Very Good | Good      | Fair  | Poor   |
| <u>In the past 7 days</u> , how often have you been bothered by emotional problems such as feeling anxious, depressed or irritable? | Never     | Rarely    | Sometimes | Often | Always |

**SUPPLEMENTAL MATERIAL**

Figure S1. Distribution of CHD diagnoses in the CH STRONG analytic sample

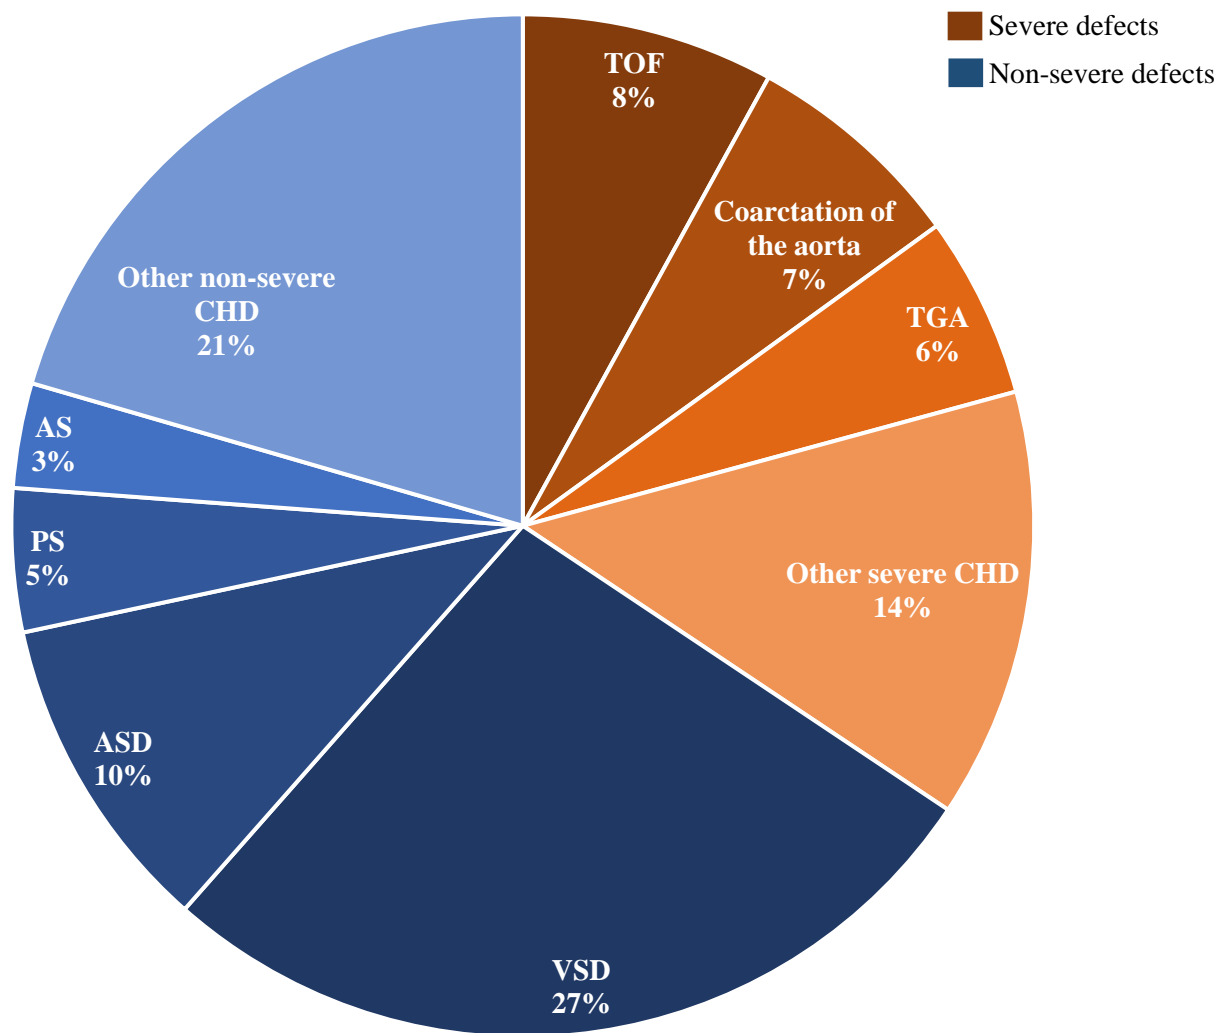

AS=Aortic Stenosis; ASD=Atrial Septal Defect; CHD=Congenital Heart Defect; PS=Pulmonary Stenosis; TGA=Transition of the Great Arteries; TOF=Tetralogy of Fallot; VSD=Ventricular Septal Defect

**SUPPLEMENTAL MATERIAL**

Figure S2. Standardized Prevalence of Disability among Adults with Severe and Non-severe CHD in 2016-2019 Congenital Heart Survey to Recognize Outcomes, Needs, and well-being Compared to 2017 ACS Participants – Excluding 567 CH STRONG participants with non-cardiac congenital anomalies or proxy-reported surveys.

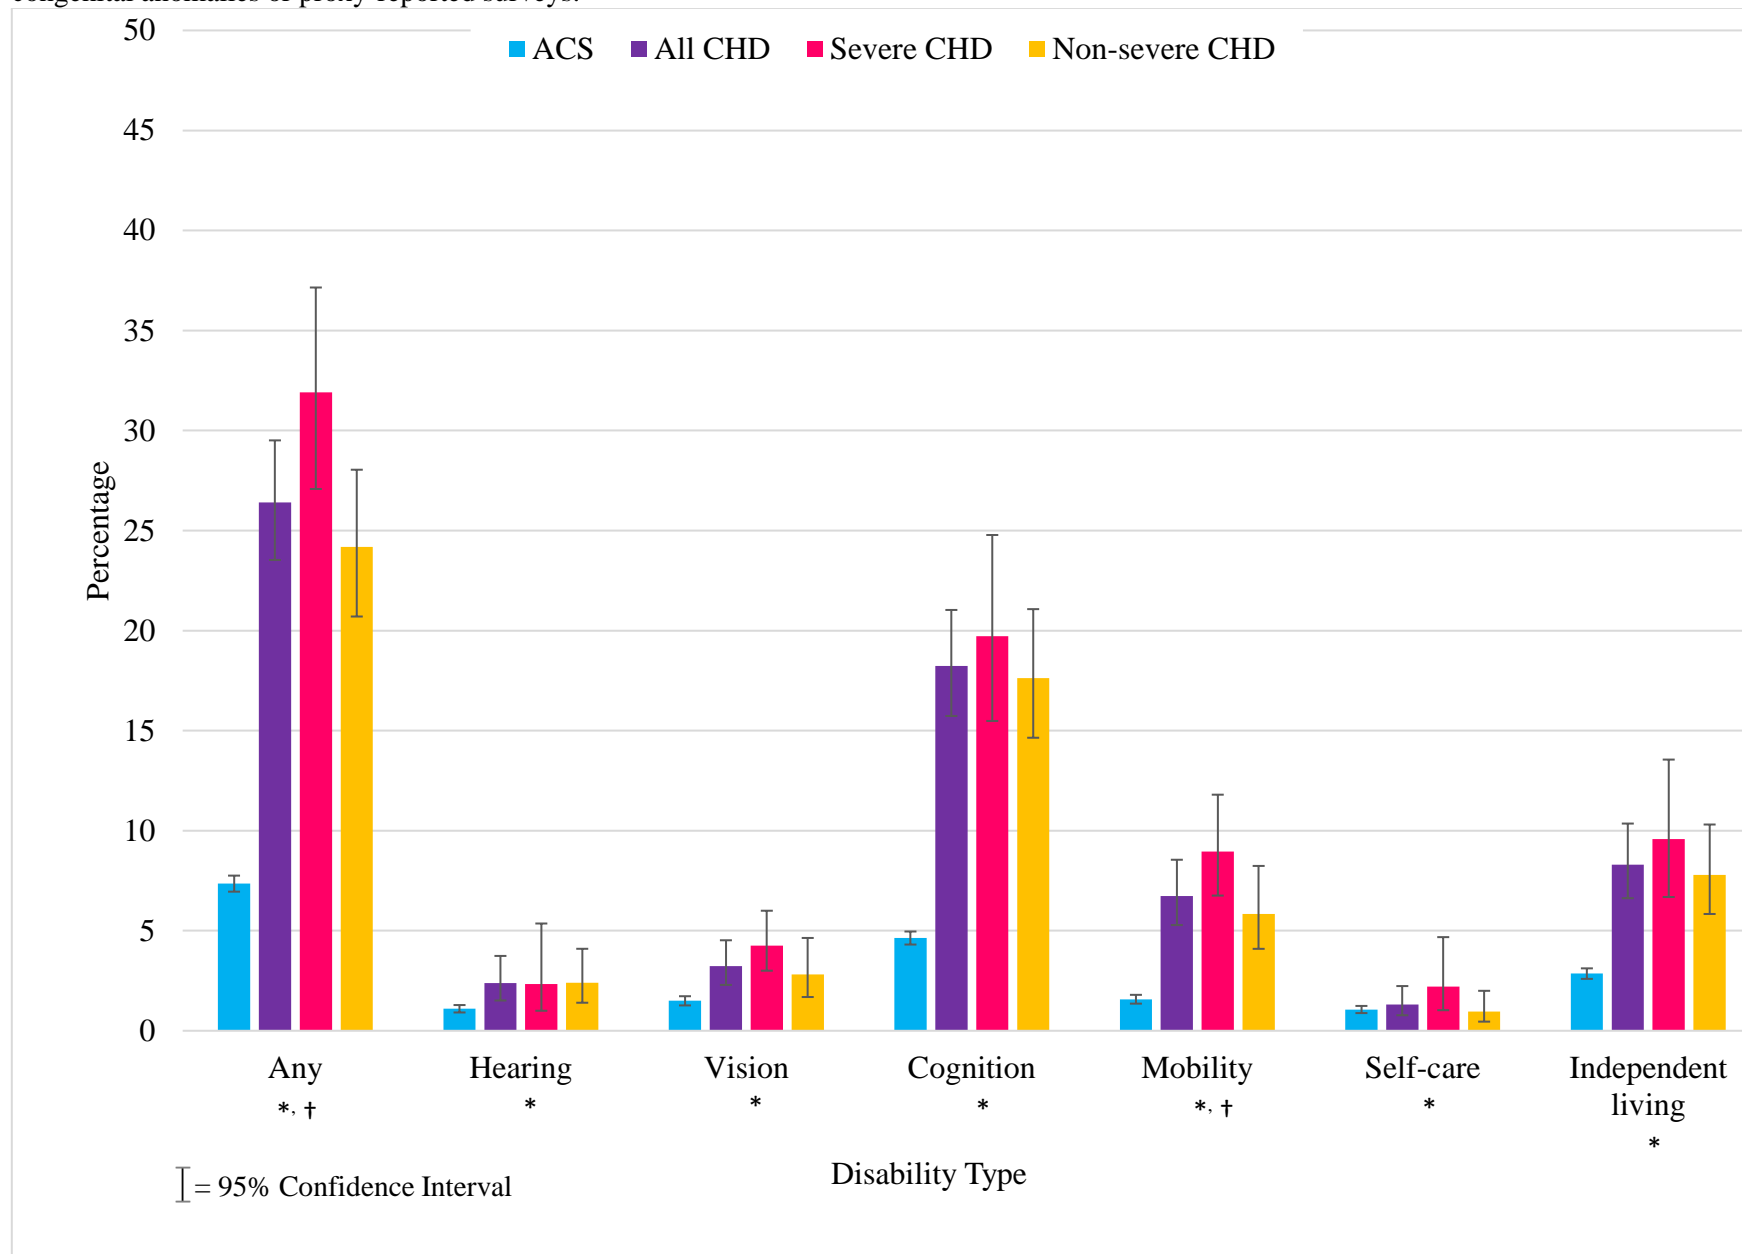

Supplement: JAH3-10-e022440-s001.pdf [file JAH3-10-e022440-s001.pdf]
